# Supplementary material for: A multi-stage computational pipeline and in vitro validation for the discovery of small-molecule translation inhibitors targeting the bacterial ribosome
Source: Royal Society of Chemistry journal article supplement (doi:10.1039/d6ra01785a), 2026-04-07
Supplement: d6ra01785a1.pdf [file d6ra01785a1.pdf]

## Supporting Information

### **A multi-stage computational pipeline and *in vitro* validation for the discovery of small-molecule translation inhibitors targeting the bacterial ribosome**

Merve Yuce<sup>1†</sup>, Ezgi Koman<sup>2,3†</sup>, Fethiye Aylin Sungur<sup>4</sup>, Ayten Karatas<sup>2,3</sup>, and Ozge Kurkcuoglu<sup>1\*</sup>

<sup>1</sup>Istanbul Technical University, Department of Chemical Engineering, Istanbul, Turkey

<sup>2</sup>Istanbul Technical University, Department of Molecular Biology and Genetics, Istanbul, Turkey

<sup>3</sup>Istanbul Technical University, Molecular Biology-Biotechnology and Genetics Research Center (MOBGAM), Istanbul, Turkey

<sup>4</sup>Istanbul Technical University, Computational Science and Engineering Division, Informatics Institute, Istanbul, Turkey

Corresponding author: [olevitas@itu.edu.tr](mailto:olevitas@itu.edu.tr)

<sup>†</sup>These authors have equal contribution.

## Molecular Docking to the Peptidyl Transferase Center of the *E. coli* ribosome:

**Setting the parameters of Glide / Validation of the Docking Protocol:** During the validation step, the docked poses are compared to the native structure ((PDB ID: 4v7v), and the parameters of the calculations that yield a low RMSD were noted. With this purpose, clindamycin was extracted from the clindamycin-bound ribosome structure prepared with the Protein Preparation Wizard implemented in Maestro and re-docked to the binding site by changing/adjusting the default values of the parameters in the software. The 50S large subunit structure (23S rRNA, 5S rRNA, crystal waters, Mg<sup>2+</sup> ions) in the protein preparation module (Schrodinger Release 2021-4) had a net charge of -2691, and clindamycin was protonated with a charge of +1. Docking studies were performed using Maestro-Glide at standard precision-SP (standard precision) and extra-precision-XP (extra precision) modes.

First, standard precision (SP)-docking calculations were performed and the best pose was determined to be the first pose with the highest score (GlideScore: -9.291 kcal/mol) attained after docking, which had the lowest RMSD value of 0.48 Å compared to the co-crystallized inhibitor. **Figure S1(a)** compares the crystal orientation of the clindamycin molecule in the ribosome structure to the optimal orientation derived from SP-docking calculations. **Figure S1(b)** displays the interactions between 50S and re-docked clindamycin. Hydrogen bonds were primarily responsible for the inhibitor-cavity interactions are dominated by hydrogen interactions involving A2058, G2061, and G2505, which are also noted from the crystal structure. In addition, weak interactions between the inhibitor and nucleotides U2504, G2505, U2506 and A2451 are noted. Validation was then conducted with extra precision (XP)-docking using the same parameters as in SP-docking. In **Figure S2(a)**, the best pose for re-docked clindamycin, which had an XP-GlideScore of -11.02 kcal/mol and an RMSD value of 0.77 Å is shown. The interactions of the clindamycin antibiotic with the PTC cavity are displayed in 2D diagram maps using free software Biovia Discovery Studio Visualizer (<https://discover.3ds.com/discovery-studio-visualizer-download>). Clindamycin exhibited similar interactions as the SP-docking validation pose while maintaining its interactions from the native crystal structure. Several weak interactions were also observed with G2505, A2451 and C2452 nucleotides, electrostatic interactions with U2504 and G2505, as well as hydrogen bonds with A2058, G2061, and G2505 (**Figure S2(b)**). In the calculations employing both SP- and XP-docking, the binding cavity of the inhibitor, its crystal structure pose, and its non-bonding interactions were confirmed. In SP-docking mode, the minimized poses obtained during the docking were ranked using the empirical GlideScore (GScore) function with the following equation,<sup>1</sup>

$$SP\ GlideScore = C_{lipo-lipo} \sum f(r_{lr}) + C_{hbond-neut-neut} \sum g(\Delta r)h(\Delta\alpha) + C_{hbond-neut-charged} \sum g(\Delta r)h(\Delta\alpha) + C_{hbond-charged-charged} \sum g(\Delta r)h(\Delta\alpha) + C_{max-metal-ion} \sum f(r_{lm}) + C_{rota}H_{rota} + C_{polar-phob}V_{polar-phob} + C_{coul}E_{coul} + C_{vdw}E_{vdw} + solvation\ terms \quad (1)$$

where C values represent the coefficients, namely the lipophilic-lipophilic, hydrogen bonding (neutral-neutral, neutral-charged and charged-charged donor and acceptor), metal-ion interactions, rotatable bonds, penalty for polar and hydrophobic parts, Coulomb, van der Waals and solvation terms. On the other hand, pose sampling is more comprehensive in XP-docking. It is based on an *anchor-and-grow* strategy. According to this strategy, a part of the molecule is taken from the poses in the SP-docking results and labeled as the *anchor*. Using this *anchor*,

new ligand conformations are formed to lower the energy, and this step is called as *grow*<sup>2,3</sup>. Moreover, XP-docking has a different yet improved scoring function, given as,

$$XP\ GlideScore = E_{coul} + E_{vdW} + E_{bind} + E_{penalty} \quad (2)$$

$$E_{bind} = E_{hyd\_enclosure} + E_{hb\_nn\_motif} + E_{hb\_cc\_motif} + E_{PI} + E_{hb\_pair} + E_{phobic\_pair} \quad (3)$$

$$E_{penalty} = E_{desolvation} + E_{ligand\_strain} \quad (4)$$

where  $E_{coul}$ ,  $E_{vdW}$ ,  $E_{bind}$ ,  $E_{penalty}$ ,  $E_{hyd\_enclosure}$ ,  $E_{hb\_nn\_motif}$ ,  $E_{hb\_cc\_motif}$ ,  $E_{PI}$ ,  $E_{hb\_pair}$ ,  $E_{phobic\_pair}$ ,  $E_{desolvation}$  and  $E_{ligand\_strain}$  represent energy values of Coulomb, van der Waals, binding, penalty, binding hydrophobic enclosure, neutral-neutral hydrogen bonding motifs, charged-charged hydrogen bonding motifs, pi stacking and pi-cation interactions, hydrogen bond, lipophilic pair, desolvation and contact penalties terms.<sup>3</sup> Unlike SP-docking, it has additional terms for desolvation, Coulomb,  $\pi$ - $\pi$ ,  $\pi$ -cation, and van der Waals interactions. Energy optimization is applied to the bond lengths, angles, and torsion angles of the ligand following the docking process; thus, docking poses are improved (Schrödinger Release 2021-4: Glide).

**Setting the Parameters of AutoDock Vina.** In order to obtain a reliable protocol for docking with AutoDock Vina, the x-ray pose of clindamycin was reproduced by setting the parameters as described in the **Methods**. The RMSD value between the best docking pose and the crystallographic structure was determined as 0.38 Å with a docking score of -8.7 kcal/mol (**Figure S3(a)**). According to docking results, the interactions between the natural inhibitor clindamycin and the binding site involve hydrogen bonding with nucleotides A2058, G2061, and G2505. Additionally, there are electrostatic interactions with nucleotides U2504 and G2505. The interaction pattern observed in the ribosome-clindamycin complex crystal structure was similar to the best re-docking pose having hydrogen bond interactions with A2058, G2061, and G2505. In addition, electrostatic interactions were observed with U2504 and G2505 nucleotides since clindamycin charge is +1. The overlap of the ligand conformations in the best pose and the crystal structure, as well as the similarity of the reproduced inhibitor-nucleotide interactions, confirmed the parameters of the docking protocol (**Figure S3(a)-(b)**).

AutoDock Vina's empirical and knowledge-based scoring function calculates the binding affinity and ranks the binding orientations, which is the sum of the contribution of each weighted energetic factor (Trott & Olson, 2010). The Vina scoring function consists of the sum of the weights of the steric interactions (attractive Gaussian and Repulsion terms), hydrophobic interactions (Hydrophobic) and the hydrogen bonding interactions (Hbond) between the atoms given in the following equations:<sup>4,5</sup>

$$\Delta G_{Binding} = w_1 * Gauss_1(d) + w_2 * Gauss_2(d) + w_R * Repulsion(d) + w_{hp} * Hydrophobic(d) + w_{hb} * Hydrogen\ bonding(d) + w_{rot} * N_{rot} \quad (5)$$

Here  $d$  is the surface distance calculated as follows:

$$d = r - R_i - R_j \quad (6)$$

where  $r$  is the interatomic distance and  $R_i$  and  $R_j$  are the radii of the atoms in the pair.

**Table S1.** Molecular docking and Prime MM-GBSA calculations of FDA-approved drug candidates for the peptidyl transferase center.

| Drug name / DrugBank ID                      | Chemical Formula / Molecular Weight (g/mol) / Chemical structure                                                          | Chemical class         | fragment                             | XP-GScore / Vina Score (kcal/mol)       | Prime MMGBSA $\Delta G_{binding}$ (kcal/mol) | $\Delta G_{binding}$ (R1, R2, R3) (kcal/mol)             |
|----------------------------------------------|---------------------------------------------------------------------------------------------------------------------------|------------------------|--------------------------------------|-----------------------------------------|----------------------------------------------|----------------------------------------------------------|
| Clindamycin<br>DB01190<br>(native inhibitor) | <chem>C18H33ClN2O5S</chem><br>424.98<br>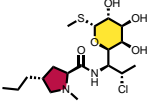 | lincosamide antibiotic | lincosamine ring,<br>pyrrolidine     | -11.3 (SP)<br>-11.5 (XP)<br>-8.9 (vina) | -113.15                                      | -27.47 ± 6.01<br>-30.51 ± 7.71<br>-31.85 ± 7.16          |
| Buserelin<br>DB06719                         | <chem>C60H86N16O13</chem><br>1239.45<br> | hormones               | indole,<br>imidazole,<br>pyrrolidine | -12.6 /                                 | -247.87                                      | -52.09 +/- 10.15<br>-66.76 +/- 13.16<br>-51.06 +/- 11.28 |
| Cabozantinib<br>DB08875                      | <chem>C28H24FN3O5</chem><br>501.51<br>   | diarylethers           | quinoline                            | / -10.1                                 | -178.15                                      | -47.28 +/- 6.94<br>-52.42 +/- 7.11<br>-46.43 +/- 8.77    |
| Daunorubicin<br>DB00694                      | <chem>C27H29NO10</chem><br>527.52<br>  | Anthracyclines         | anthracycline core                   | / -10.2                                 | -129.79                                      | -20.64 +/- 8.65<br>-30.13 +/- 11.59<br>-22.54 +/- 12.09  |
| Elbasvir<br>DB11574                          | <chem>C49H55N9O7</chem><br>882.04<br>  | Valine and derivatives | indole,<br>imidazole,<br>pyrrolidine | -12.8 /                                 | -207.59                                      | -37.41 +/- 12.12<br>-42.99 +/- 11.55<br>-56.26 +/- 12.61 |
| Metocurine<br>DB01336                        | <chem>C40H48N2O6</chem><br>652.82<br>  | diarylethers           | quinoline                            | / -10.1                                 | -185.6                                       | -42.09 +/- 11.15<br>-37.01 +/- 10.85<br>-40.09 +/- 8.72  |
| Mitoxantrone<br>DB01204                      | <chem>C22H28N4O6</chem><br>444.48<br>  | anthraquinones         | anthraquinone core                   | / -8.6                                  | -173.58                                      | -55.49 +/- 12.77<br>-41.51 +/- 5.01<br>-57.98 +/- 16.26  |
| Piperaquine<br>DB13941                       | <chem>C29H32Cl2N6</chem><br>535.52<br> | piperazines            | piperazine,<br>quinoline             | -12.0 /                                 | -294.43                                      | -74.11 +/- 5.50<br>-76.96 +/- 6.80<br>-99.69 +/- 6.35    |

|                        |                                                                                                                     |                    |                                   |         |         |                                                          |
|------------------------|---------------------------------------------------------------------------------------------------------------------|--------------------|-----------------------------------|---------|---------|----------------------------------------------------------|
| Plerixafor<br>DB06809  | $C_{28}H_{54}N_8$<br>502.78<br>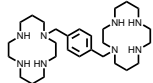    | benzenoids         | azamacrocycle                     | -13.7 / | -313.73 | -61.19 +/- 6.17<br>-55.04 +/- 4.85<br>-54.06 +/- 5.28    |
| Vinblastine<br>DB00570 | $C_{46}H_{58}N_4O_9$<br>810.97<br> | vinca<br>alkaloids | indole,<br>vinca alkaloid<br>core | -10.8 / | -221.37 | -22.41 +/- 14.07<br>-26.94 +/- 11.75<br>-32.01 +/- 11.64 |
| Vinorelbine<br>DB00361 | $C_{45}H_{54}N_4O_8$<br>778.95<br> | vinca<br>alkaloids | indole,<br>vinca alkaloid<br>core | -10.8 / | -191.4  | -23.43 +/- 8.76<br>-20.03 +/- 9.01<br>-24.52 +/- 7.48    |

**Table S2.** Molecular docking and Prime MM-GBSA calculations of Experimental drug candidates for the peptidyl transferase center. Clindamycin is the reference compound.

| Drug name / DrugBank ID | Chemical Formula / Molecular Weight (g/mol) / chemical structure                                                                                                  | chemical class           | fragment                                  | XP-GScore / Vina Score (kcal/mol) | Prime MMGBSA $\Delta G_{binding}$ (kcal/mol) | $\Delta G_{binding}$ (R1, R2, R3) (kcal/mol)             |
|-------------------------|-------------------------------------------------------------------------------------------------------------------------------------------------------------------|--------------------------|-------------------------------------------|-----------------------------------|----------------------------------------------|----------------------------------------------------------|
| DB01450                 | C <sub>25</sub> H <sub>35</sub> NO <sub>4</sub><br>413.55<br>                    | benzoids                 | coumaran                                  | / -8.4                            | -116.43                                      | -22.89 +/- 6.68<br>-31.29 +/- 6.72<br>-29.55 +/- 7.48    |
| DB01705                 | C <sub>17</sub> H <sub>19</sub> N <sub>8</sub><br>335.39<br>                     | benzimidazol<br>es       | benzimidazole                             | / -9.6                            | -159.77                                      | -20.83 +/- 12.33<br>-17.14 +/- 10.24<br>-24.21 +/- 10.73 |
| DB01876                 | C <sub>17</sub> H <sub>14</sub> N <sub>8</sub> O<br>346.35<br>                   | benzimidazol<br>es       | benzimidazole                             | / -10.1                           | -154.82                                      | -32.66 +/- 10.99<br>-35.86 +/- 12.62<br>-36.90 +/- 10.68 |
| DB02427                 | C <sub>18</sub> H <sub>21</sub> N <sub>5</sub> O <sub>2</sub> 339.39<br>        | quinazolinam<br>ines     | quinazoline                               | / -9.2                            | -137.53                                      | -36.93 +/- 8.46<br>-21.99 +/- 9.47<br>-25.77 +/- 6.16    |
| DB02616                 | C <sub>16</sub> H <sub>15</sub> N <sub>7</sub> S <sub>2</sub><br>369.47<br>    | benzimidazol<br>es       | benzimidazole<br>, thiophene,<br>thiazole | / -10.1                           | -179.34                                      | -30.34 +/- 12.38<br>-37.52 +/- 16.82<br>-55.19 +/- 11.08 |
| DB02844                 | C <sub>18</sub> H <sub>29</sub> N <sub>7</sub> O <sub>3</sub> S<br>4234.53<br> | purine<br>nucleoside     | adenine,<br>furanose                      | -11.6 /                           | -152.64                                      | -23.19 +/- 14.98<br>-16.42 +/- 10.71<br>-27.37 +/- 14.14 |
| DB03373                 | C <sub>27</sub> H <sub>31</sub> N <sub>6</sub> O<br>455.58<br>                 | naphthalenes             | benzimidazole<br>, piperidine             | / -10.8                           | -195.68                                      | -46.29 +/- 12.10<br>-68.14 +/- 7.81<br>-54.00 +/- 9.54   |
| DB03933                 | C <sub>43</sub> H <sub>45</sub> ClN <sub>3</sub> O <sub>13</sub><br>847.28<br> | aminoglycosi<br>de       | pyranose                                  | / -11.5                           | -224.94                                      | -29.13 +/- 12.83<br>-35.85 +/- 12.21<br>-58.97 +/- 8.39  |
| DB03986                 | C <sub>11</sub> H <sub>16</sub> N <sub>5</sub> O <sub>4</sub><br>282.28<br>    | C-glycosyl<br>compounds  | adenine,<br>furanose                      | / -9.2                            | -201.23                                      | -41.69 +/- 11.39<br>-54.26 +/- 6.45<br>-31.21 +/- 5.52   |
| DB04877                 | C <sub>43</sub> H <sub>52</sub> N <sub>4</sub> O <sub>5</sub><br>704.90<br>    | Ibogan-tyoe<br>alkaloids | indole                                    | / -9.2                            | -148.21                                      | -23.61 +/- 10.25<br>-19.32 +/- 12.41<br>-17.70 +/- 10.40 |

|         |                                                                                                                        |                          |                            |         |         |                                                         |
|---------|------------------------------------------------------------------------------------------------------------------------|--------------------------|----------------------------|---------|---------|---------------------------------------------------------|
| DB06899 | $C_{20}H_{26}N_6O_2S$<br>414.52<br>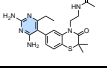   | benzothiazines           | pyrimidine                 | / -8.9  | -121.41 | -41.77 +/- 5.93<br>-36.64 +/- 10.66<br>-43.82 +/- 7.13  |
| DB06995 | $C_{20}H_{16}F_2N_4O_3$<br>398.36<br> | N-acyl-phenylureas       | pyridine                   | / -9.8  | -131.09 | -45.05 +/- 10.88<br>-46.97 +/- 6.31<br>-55.39 +/- 6.33  |
| DB07113 | $C_{24}H_{25}F_2N_5O_3$<br>469.48<br> | benzoxazinones           | pyrimidine                 | / -9.3  | -156.42 | -35.83 +/- 7.18<br>-57.61 +/- 6.55<br>-32.97 +/- 7.16   |
| DB07618 | $C_{24}H_{31}N_5O_2$<br>421.54<br>    | Alpha amino acid amides  | piperidine,<br>pyrazole    | / -10.6 | -140.74 | -44.85 +/- 14.75<br>-43.73 +/- 9.78<br>-43.94 +/- 9.42  |
| DB07642 | $C_{21}H_{24}FN_5O$<br>381.45<br>     | N-benzylpiperidines      | piperidine,<br>quinazoline | / -9.5  | -178.76 | -10.62 +/- 16.95<br>-45.84 +/- 9.53<br>-17.06 +/- 11.35 |
| DB07994 | $C_{26}H_{23}N_5O$<br>421.50<br>     | Indoles                  | indole,<br>pyridine        | / -10.0 | -144.58 | -25.11 +/- 12.15<br>-39.80 +/- 4.62<br>-32.42 +/- 7.64  |
| DB08099 | $C_{25}H_{31}N_5O$<br>417.55<br>    | phenylquinolines         | pyrimidine,<br>piperidine  | / -8.4  | -109.75 | -40.29 +/- 6.78<br>-25.54 +/- 11.63<br>-46.40 +/- 4.59  |
| DB08674 | $C_{26}H_{21}N_5O_2$<br>435.48<br>  | Macrolactams             | imidazole,<br>pyrrolidine  | / -9.6  | -116.79 | -33.1 +/- 9.36<br>-22.64 +/- 6.89<br>-26.95 +/- 6.65    |
| DB14066 | $C_{38}H_{42}N_2O_6$<br>622.76<br>  | Lignans,<br>diarylethers | quinoline                  | / -11.0 | -163.61 | -45.69 +/- 11.49<br>-50.29 +/- 9.62<br>-48.00 +/- 7.48  |

**Table S3.** Molecular docking and Prime MM-GBSA calculations of Investigational drug candidates for the peptidyl transferase center. Clindamycin is the reference compound.

| Drug name / DrugBank ID | Chemical Formula / Molecular Weight (g/mol) / chemical structure                                                            | chemical class           | fragment                                  | XP-GScore / Vina Score (kcal/mol) | Prime MMGBSA $\Delta G_{binding}$ (kcal/mol) | $\Delta G_{binding}$ (R1, R2, R3) (kcal/mol)             |
|-------------------------|-----------------------------------------------------------------------------------------------------------------------------|--------------------------|-------------------------------------------|-----------------------------------|----------------------------------------------|----------------------------------------------------------|
| Acarbose<br>DB00284     | <chem>C25H43NO18</chem><br>645.61<br>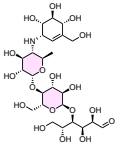      | Aminocyclitol glycosides | pyranose                                  | -14.3 /                           | -159.40                                      | -26.25 +/- 13.93<br>-36.62 +/- 13.81<br>-34.68 +/- 12.20 |
| Alvocidib<br>DB03496    | <chem>C21H20ClNO5</chem><br>401.84<br>     | flavones                 | flavone core (benzopyrone)                | / -9.2                            | -127.00                                      | -33.04 +/- 8.57<br>-46.47 +/- 5.46<br>-31.42 +/- 9.06    |
| ATN-161<br>DB05491      | <chem>C23H35N9O8S</chem><br>597.65<br>    | peptides                 | imidazole, pyrrolidine                    | / -9.7                            | -138.98                                      | -29.65 +/- 9.38<br>-34.99 +/- 11.69<br>-26.15 +/- 15.27  |
| BMS-214662<br>DB12234   | <chem>C25H23N5O2S2</chem><br>489.61<br>  | 1, 4 benzodiazepines     | imidazole, thiophene                      | / -9.0                            | -116.10                                      | -22.07 +/- 11.07<br>-35.85 +/- 10.62<br>-32.01 +/- 8.10  |
| Enzastaurin<br>DB06486  | <chem>C32H29N5O2</chem><br>515.62<br>    | N-alkylindoles           | indole, pyrrolidine, piperidine, pyridine | / -11.4                           | -140.21                                      | -36.83 +/- 5.90<br>-23.06 +/- 9.53<br>-24.26 +/- 11.51   |
| GSK-690693<br>DB12745   | <chem>C21H27N7O3</chem><br>425.48<br>    | Imidazopyridines         | imidazole, piperidine, pyridine           | / -9.7                            | -130.01                                      | -17.72 +/- 11.65<br>-23.87 +/- 10.42<br>-31.00 +/- 12.08 |
| Olcegepant<br>DB04869   | <chem>C38H47Br2N9O5</chem><br>869.65<br> | dipeptides               | piperidine, piperazine, pyridine          | -12.7 /                           | -224.18                                      | -49.87 +/- 12.14<br>-60.61 +/- 10.92<br>-60.72 +/- 15.15 |
| Orteronel<br>DB12066    | <chem>C18H17N3O2</chem><br>307.35<br>    | naphthalenecarboxamides  | imidazole, naphthalene                    | / -9.1                            | -127.58                                      | -37.83 +/- 9.14<br>-47.61 +/- 7.08<br>-43.11 +/- 7.33    |

|                         |                                                                                                                        |                               |                                       |         |         |                                                         |
|-------------------------|------------------------------------------------------------------------------------------------------------------------|-------------------------------|---------------------------------------|---------|---------|---------------------------------------------------------|
| PF-232798<br>DB14813    | $C_{29}H_{40}FN_5O_2$<br>509.67<br>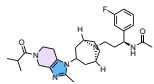   | heterocyclic                  | imidazole,<br>piperidine              | / -10.2 | -214.05 | -42.08 +/- 10.56<br>-32.48 +/- 18.40<br>-49.80 +/- 9.63 |
| Pirarubicin<br>DB11616  | $C_{32}H_{37}NO_{12}$<br>627.64<br>   | anthracyclines                | anthracycline<br>core                 | -11.5 / | -156.18 | -16.97 +/- 56.71<br>-28.79 +/- 9.42<br>-17.96 +/- 12.15 |
| Plinabulin<br>DB05992   | $C_{19}H_{20}N_4O_2$<br>336.40<br>    | piperazines                   | imidazole                             | -11.0 / | -228.94 | -78.43 +/- 7.45<br>-87.83 +/- 9.02<br>-83.88 +/- 6.65   |
| Ronopterin<br>DB12575   | $C_9H_{16}N_6O_2$<br>240.26<br>       | Pteridines and<br>derivatives | pteridine                             | / -8.6  | -113.85 | -25.13 +/- 12.22<br>-15.68 +/- 8.42<br>-26.69 +/- 10.94 |
| Ziritaxestat<br>DB15403 | $C_{30}H_{33}FN_8O_2S$<br>588.71<br> | piperazines                   | piperazine,<br>imidazole,<br>thiazole | / -11.0 | -241.43 | -60.86 +/- 11.79<br>-58.80 +/- 11.36<br>-55.41 +/- 9.60 |

**Table S4.** Optical density measurements at a wavelength of 600 nm ( $OD_{600}$ ) for the various dilutions of clindamycin incubated with *E. coli* ATCC 10536

| Clindamycin concentration ( $\mu\text{g/ml}$ ) | 128  | 64    | 32   | 16          | 8     | 4     | 2     | 1     | 0.5  |
|------------------------------------------------|------|-------|------|-------------|-------|-------|-------|-------|------|
| $OD_{600}$                                     | 0.00 | 0.00  | 0.00 | <b>0.01</b> | 0.13  | 0.17  | 0.71  | 1.20  | 1.42 |
| $OD_{600}$                                     | 0.00 | 0.00  | 0.00 | <b>0.00</b> | 0.03  | 0.04  | 0.78  | 0.99  | 1.00 |
| $OD_{600}$                                     | 0.00 | 0.00  | 0.00 | <b>0.00</b> | 0.08  | 0.08  | 0.68  | 1.19  | 1.03 |
| Mean                                           | 0.00 | 0.00  | 0.00 | <b>0.00</b> | 0.08  | 0.10  | 0.73  | 1.13  | 1.15 |
| Std. Dev.                                      | 0.02 | 0.01  | 0.00 | <b>0.01</b> | 0.04  | 0.06  | 0.04  | 0.09  | 0.19 |
| Clindamycin concentration ( $\mu\text{g/ml}$ ) | 0.25 | 0.125 | 0.06 | 0.03        | 0.016 | 0.008 | 0.004 | 0.002 | 0    |
| $OD_{600}$                                     | 1.45 | 1.46  | 1.52 | 1.43        | 1.48  | 1.46  | 1.51  | 1.50  | 1.56 |
| $OD_{600}$                                     | 1.17 | 1.35  | 1.50 | 1.43        | 1.45  | 1.53  | 1.55  | 1.51  | 1.55 |
| $OD_{600}$                                     | 1.17 | 1.31  | 1.54 | 1.47        | 1.49  | 1.35  | 1.47  | 1.37  | 1.56 |
| Mean                                           | 1.26 | 1.37  | 1.52 | 1.44        | 1.47  | 1.45  | 1.51  | 1.46  | 1.56 |
| Std. Dev.                                      | 0.13 | 0.07  | 0.02 | 0.02        | 0.02  | 0.07  | 0.03  | 0.07  | 0.01 |

**Table S5.** Optical density measurements at a wavelength of 600 nm ( $OD_{600}$ ) for the various dilutions of mitoxantrone incubated with *E. coli* ATCC 10536

| Mitoxantrone concentration ( $\mu\text{g/ml}$ ) | 128  | 64          | 32   | 16   | 8     | 4     | 2     | 1     | 0.5  |
|-------------------------------------------------|------|-------------|------|------|-------|-------|-------|-------|------|
| $OD_{600}$                                      | 0.12 | <b>0.08</b> | 0.19 | 0.21 | 0.81  | 1.20  | 1.53  | 1.45  | 1.44 |
| $OD_{600}$                                      | 0.13 | <b>0.11</b> | 0.15 | 0.17 | 0.72  | 1.17  | 1.33  | 1.35  | 1.30 |
| $OD_{600}$                                      | 0.18 | <b>0.09</b> | 0.18 | 0.16 | 0.71  | 1.20  | 1.32  | 1.35  | 1.37 |
| Mean                                            | 0.14 | <b>0.09</b> | 0.17 | 0.18 | 0.75  | 1.19  | 1.39  | 1.38  | 1.37 |
| Std. Dev.                                       | 0.03 | <b>0.01</b> | 0.02 | 0.02 | 0.05  | 0.01  | 0.10  | 0.05  | 0.06 |
| Mitoxantrone concentration ( $\mu\text{g/ml}$ ) | 0.25 | 0.125       | 0.06 | 0.03 | 0.016 | 0.008 | 0.004 | 0.002 | 0    |
| $OD_{600}$                                      | 1.46 | 1.51        | 1.60 | 1.33 | 1.29  | 1.24  | 1.28  | 1.20  | 1.17 |
| $OD_{600}$                                      | 1.43 | 1.41        | 1.55 | 1.31 | 1.25  | 1.20  | 1.20  | 1.23  | 1.30 |
| $OD_{600}$                                      | 1.33 | 1.43        | 1.52 | 1.32 | 1.27  | 1.23  | 1.25  | 1.23  | 1.23 |
| Mean                                            | 1.40 | 1.45        | 1.56 | 1.32 | 1.27  | 1.22  | 1.24  | 1.22  | 1.24 |
| Std. Dev.                                       | 0.06 | 0.04        | 0.03 | 0.01 | 0.02  | 0.02  | 0.03  | 0.02  | 0.05 |

**Table S6.** Optical density measurements at a wavelength of 600 nm ( $OD_{600}$ ) for the various dilutions of daunorubicin incubated with *E. coli* ATCC 10536

| Daunorubicin concentration ( $\mu\text{g/ml}$ ) | 128         | 64    | 32   | 16   | 8     | 4     | 2     | 1     | 0.5  |
|-------------------------------------------------|-------------|-------|------|------|-------|-------|-------|-------|------|
| $OD_{600}$                                      | <b>0.00</b> | 0.18  | 0.47 | 1.33 | 1.47  | 1.44  | 1.32  | 1.26  | 1.36 |
| $OD_{600}$                                      | <b>0.02</b> | 0.14  | 0.32 | 1.26 | 1.14  | 1.18  | 1.15  | 1.16  | 1.37 |
| $OD_{600}$                                      | <b>0.03</b> | 0.16  | 0.49 | 1.21 | 1.21  | 1.19  | 1.48  | 1.17  | 1.31 |
| Mean                                            | <b>0.01</b> | 0.16  | 0.43 | 1.27 | 1.28  | 1.27  | 1.31  | 1.20  | 1.35 |
| Std. Dev.                                       | <b>0.01</b> | 0.02  | 0.07 | 0.05 | 0.14  | 0.12  | 0.14  | 0.04  | 0.02 |
| Daunorubicin concentration ( $\mu\text{g/ml}$ ) | 0.25        | 0.125 | 0.06 | 0.03 | 0.016 | 0.008 | 0.004 | 0.002 | 0    |
| $OD_{600}$                                      | 1.38        | 1.35  | 1.62 | 1.51 | 1.17  | 1.14  | 1.41  | 1.06  | 1.28 |
| $OD_{600}$                                      | 1.16        | 1.17  | 1.24 | 1.37 | 1.16  | 1.15  | 1.39  | 1.37  | 1.13 |
| $OD_{600}$                                      | 1.19        | 1.30  | 1.33 | 1.42 | 1.52  | 1.26  | 1.23  | 1.23  | 1.23 |
| Mean                                            | 1.24        | 1.27  | 1.40 | 1.43 | 1.28  | 1.18  | 1.35  | 1.22  | 1.21 |
| Std. Dev.                                       | 0.10        | 0.07  | 0.16 | 0.06 | 0.16  | 0.05  | 0.08  | 0.12  | 0.06 |

### Clindamycin

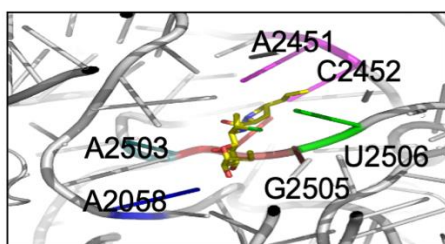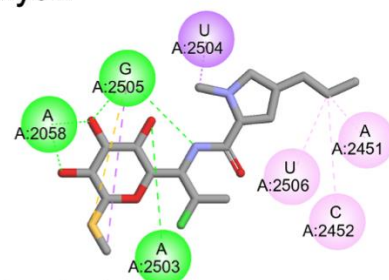

### Chloramphenicol

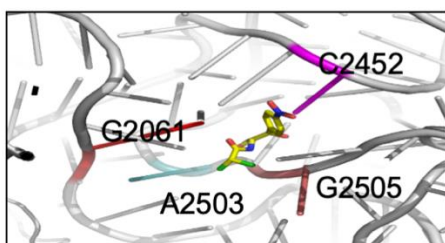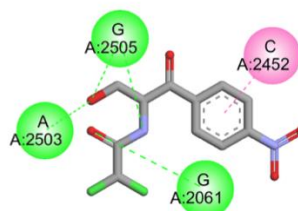

### Linezolid

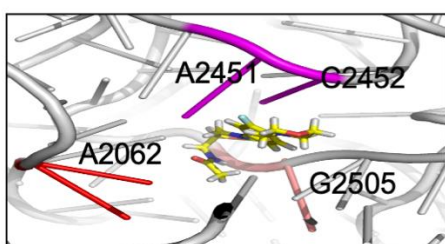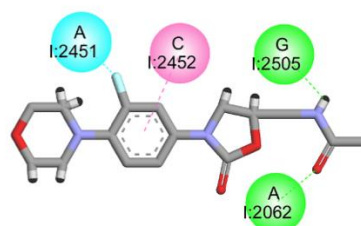

### Hygromycin A

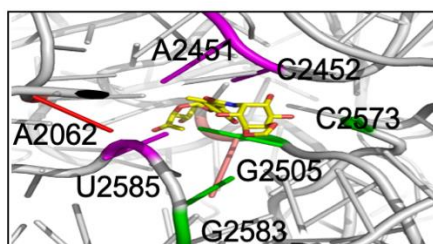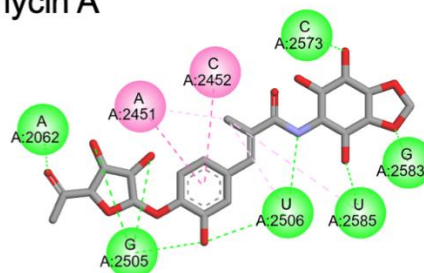

### A201A

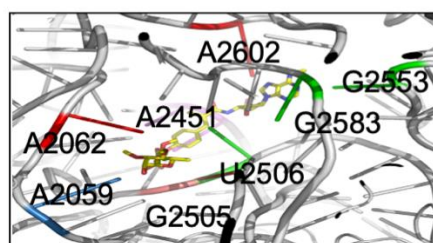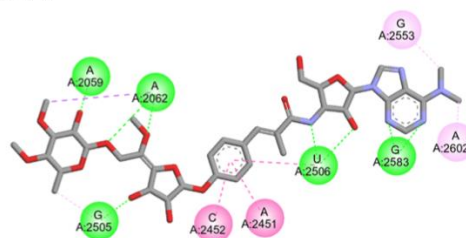

#### Interactions

- |                                                    |                                                      |
|----------------------------------------------------|------------------------------------------------------|
| <span style="color: green;">■</span> Hydrogen Bond | <span style="color: magenta;">■</span> Pi-Pi stacked |
| <span style="color: cyan;">■</span> Pi-Pi T-shaped | <span style="color: lightblue;">■</span> Pi-Alkyl    |
| <span style="color: purple;">■</span> Pi-Sigma     | <span style="color: yellow;">■</span> Halogen        |
| <span style="color: orange;">■</span> Pi-Sulfur    |                                                      |

Figure S1. 2D interaction diagrams of known PTC-targeting antibiotics

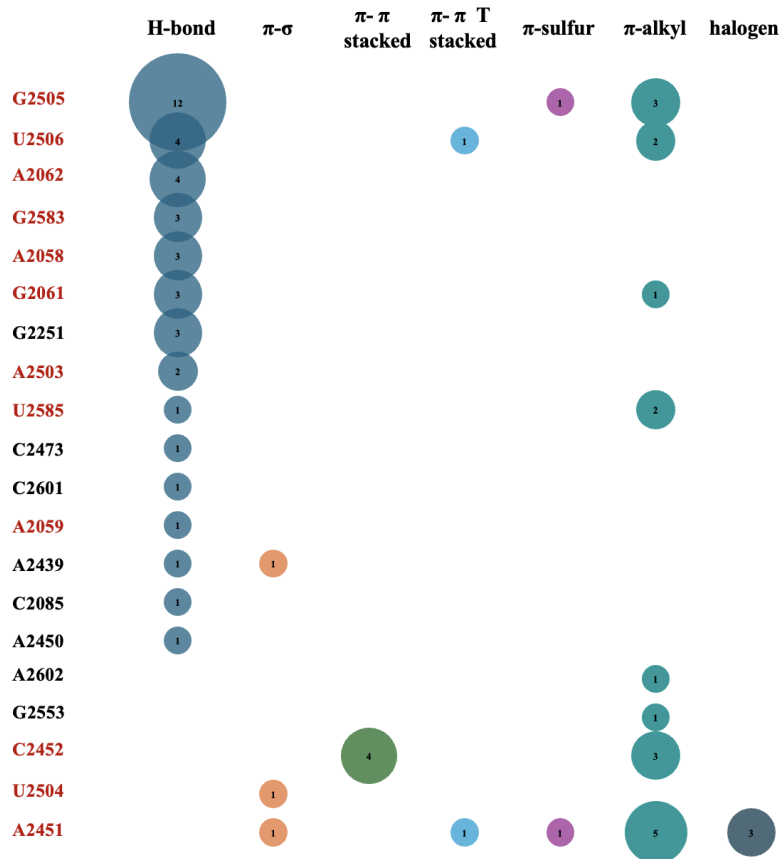

(a)

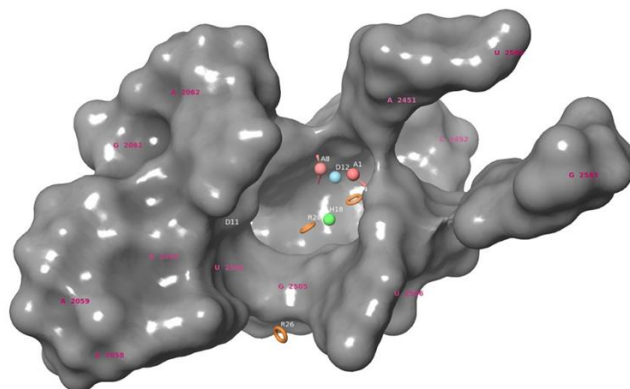

| Feature | X      | Y      | Z      | Feature type           |
|---------|--------|--------|--------|------------------------|
| H18     | -79.50 | -57.88 | 0.47   | Hydrophobic            |
| R24     | -79.88 | -55.77 | 0.12   | Aromatic ring          |
| R28     | -76.41 | -57.28 | 1.49   | Aromatic ring          |
| R26     | -69.61 | -59.98 | -0.87  | Aromatic ring          |
| A8      | -79.03 | -54.98 | 3.06   | hydrogen bond acceptor |
| D11     | -78.48 | -62.97 | 5.04   | hydrogen bond donor    |
| A1      | -75.83 | -51.78 | 1.66   | hydrogen bond acceptor |
| D12     | -81.28 | -56.23 | -56.23 | hydrogen bond donor    |

(b)

**Figure S2.** (a) Number of interactions of PTC-targeting antibiotics (b) Pharmacophore hypothesis consisting of 8 features designed for the PTC cavity.

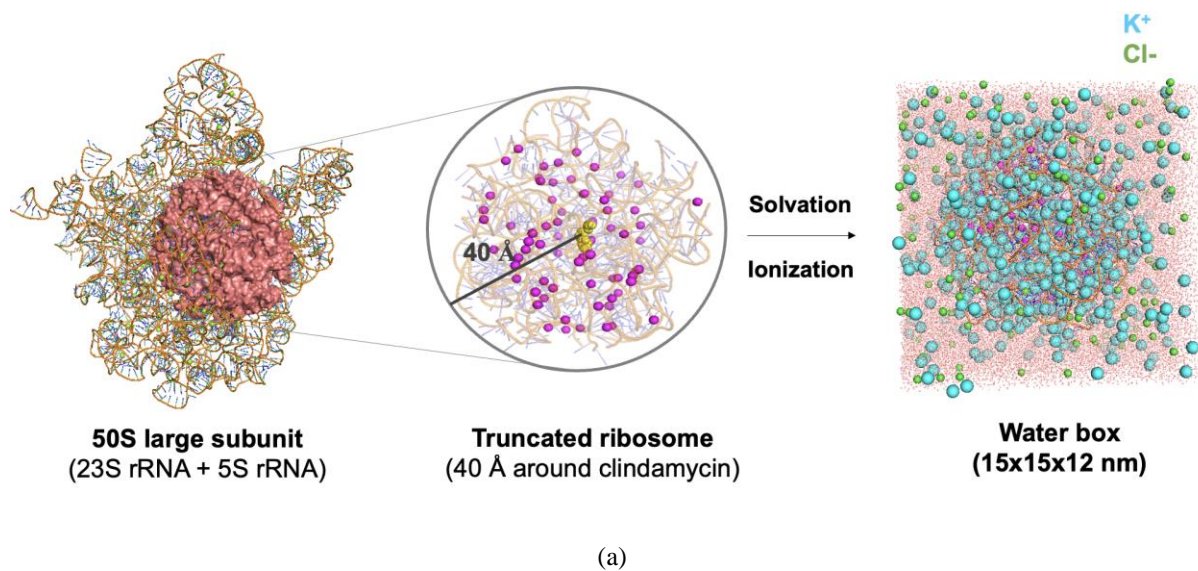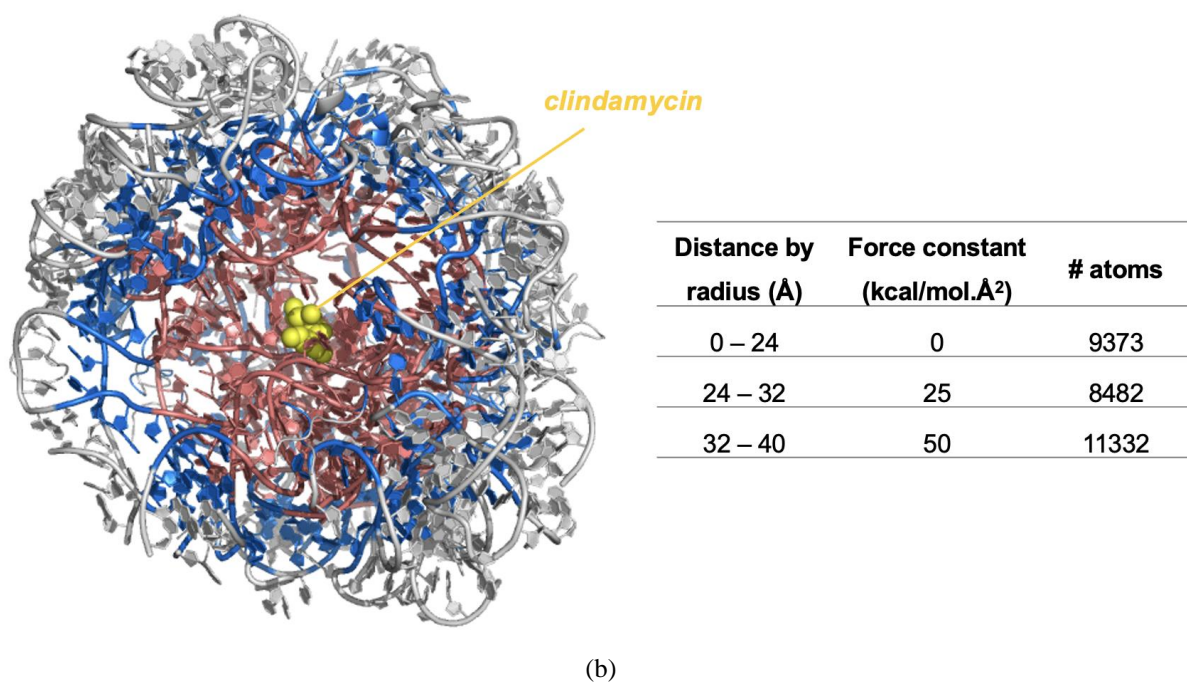

**Figure S3.** (a) MD setup and (b) Harmonic restraint zones on truncated ribosome structure.

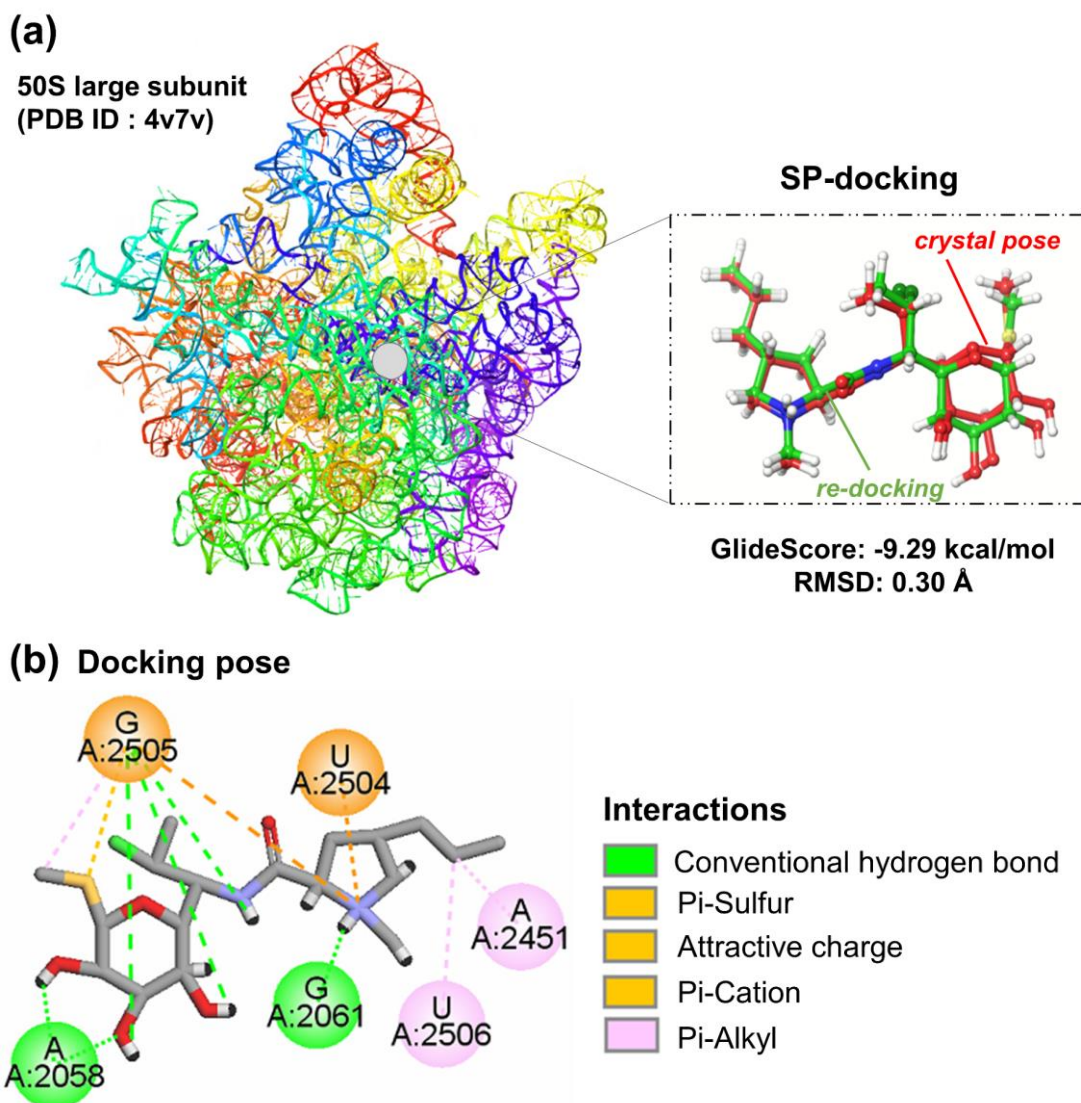

**Figure S4.** (a) Comparison of the crystal pose and best pose of the native inhibitor Clindamycin derived as a result of SP-docking validation (crystal pose: red, best docking pose: green). (b) 2D interaction diagrams for Clindamycin – ribosome interactions. SP-docking best pose is determined by SP-docking validation.

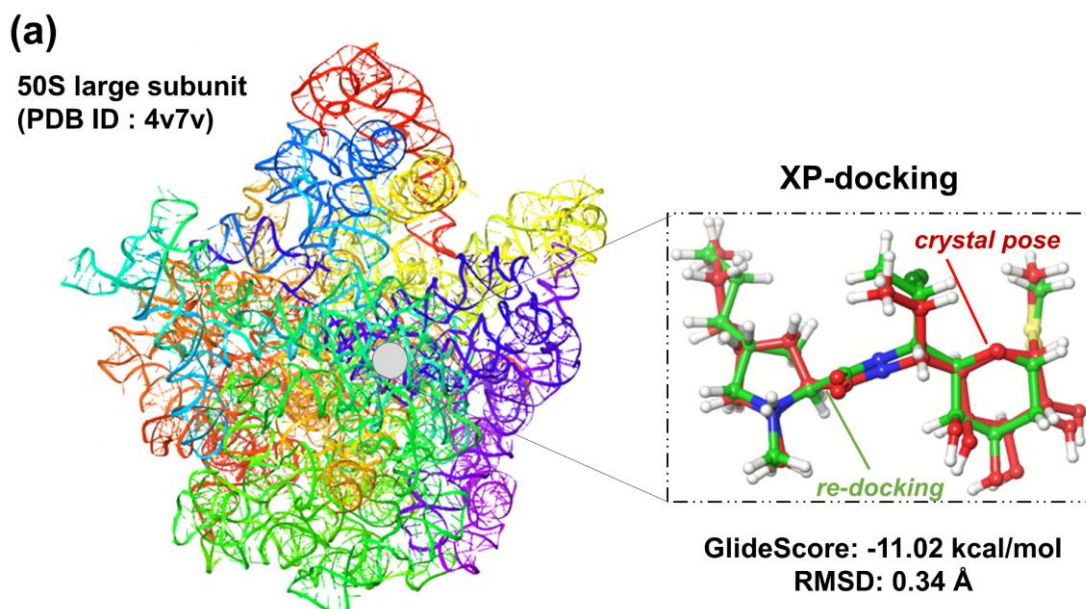

**(b) Docking pose**

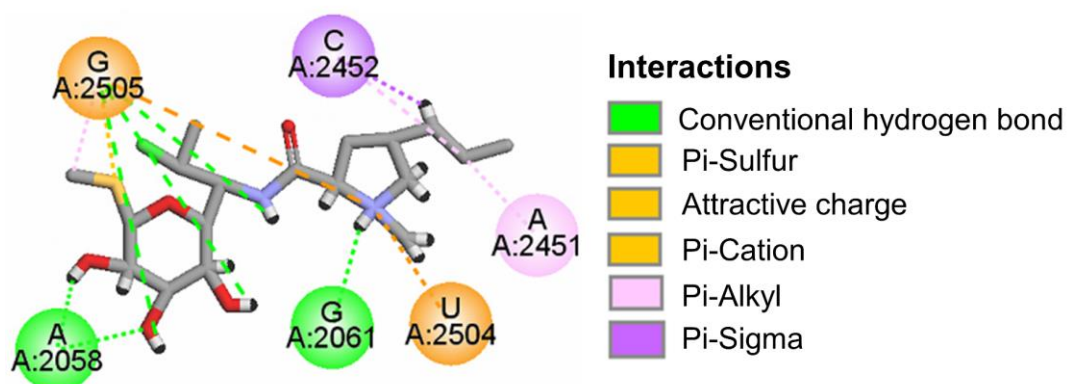

**Figure S5.** (a) Comparison of the crystal pose and best pose of the native inhibitor Clindamycin derived as a result of XP-docking validation (crystal pose: red, best docking pose: green). (b) 2D interaction diagrams for Clindamycin – ribosome interactions. XP-docking best pose is determined by XP-docking validation.

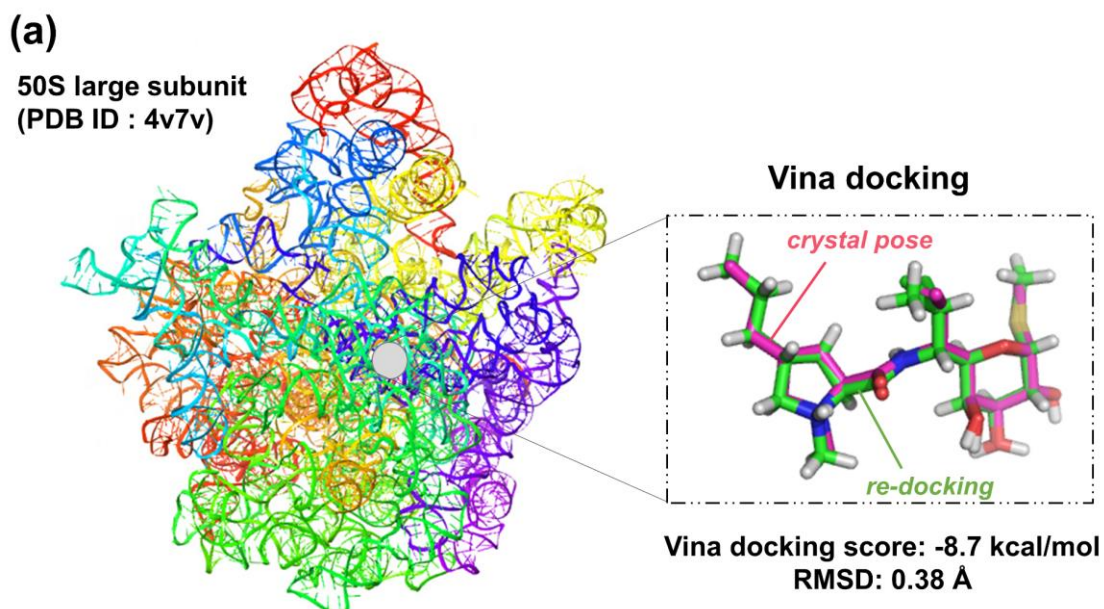

**(b) Docking pose**

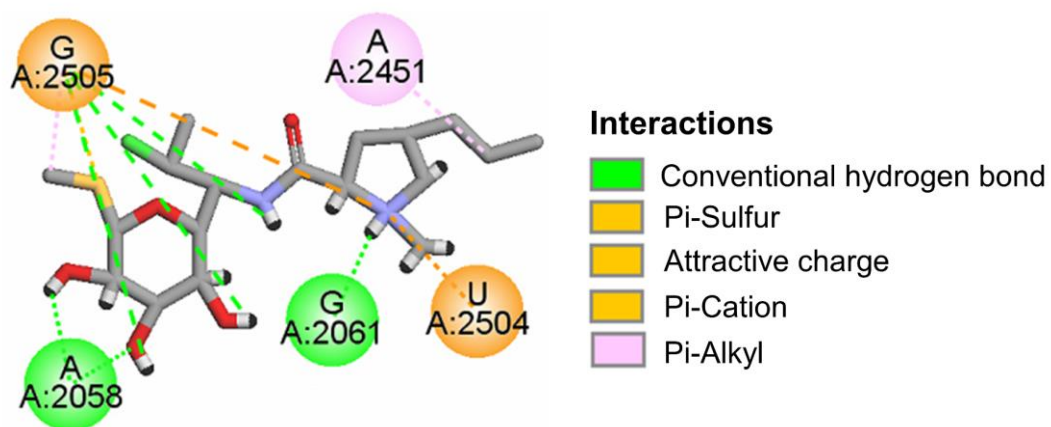

**Figure S6.** (a) Comparison of the crystal pose and best pose of the native inhibitor Clindamycin derived as a result of AutoDock Vina-docking validation (crystal pose: pink, best docking pose: green) (b) 2D interaction diagrams for Clindamycin – ribosome interactions.

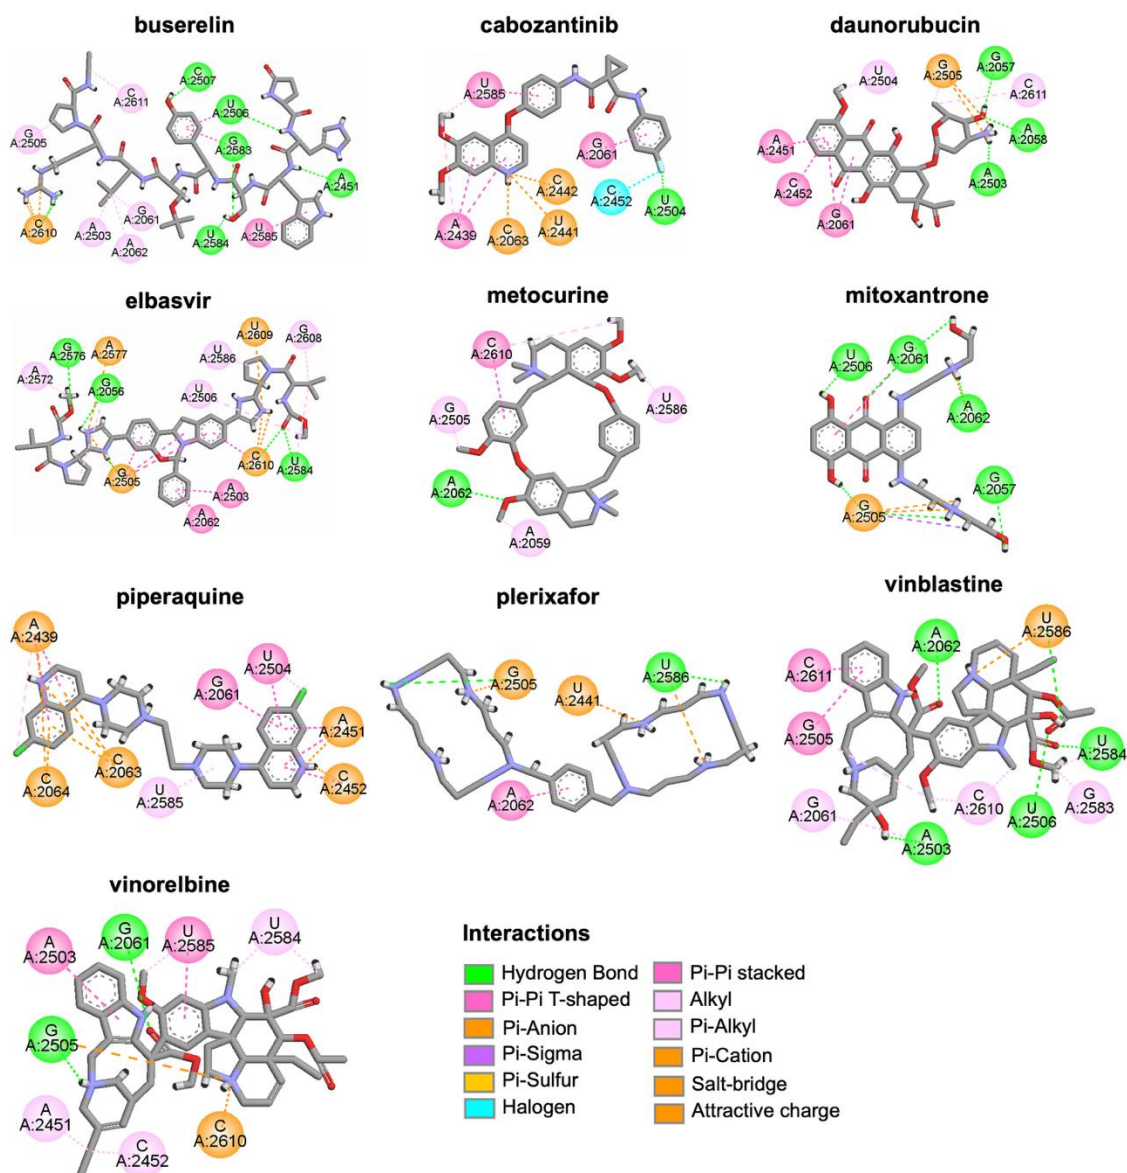

**Figure S7.** 2D interaction maps for FDA-approved hit compounds obtained from Maestro XP-docking followed by Prime MM-GBSA calculations. Only polar hydrogens are displayed on 2D interaction maps. The non-bonded interactions between the ligand and the surrounding nucleotides based on the color-codes are displayed with dashed lines on 2D maps.

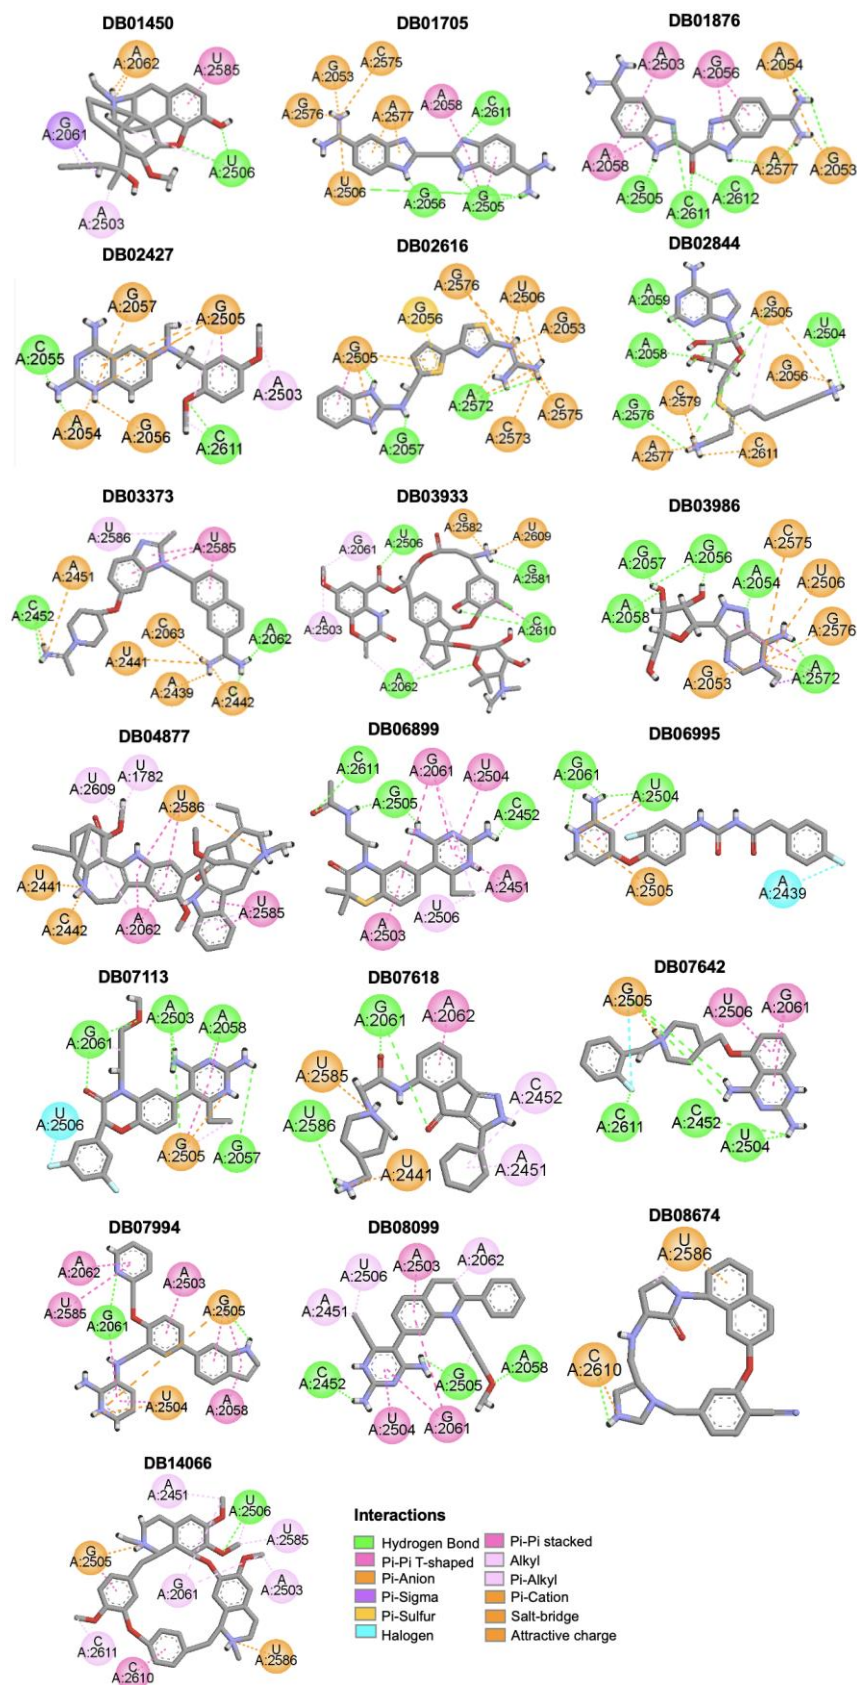

**Figure S8.** 2D interaction maps for Experimental hit compounds obtained from Maestro XP-docking followed by Prime MM-GBSA calculations. Only polar hydrogens are displayed on 2D interaction maps. The non-bonded interactions between the ligand and the surrounding nucleotides based on the color-codes are displayed with dashed lines on 2D maps.

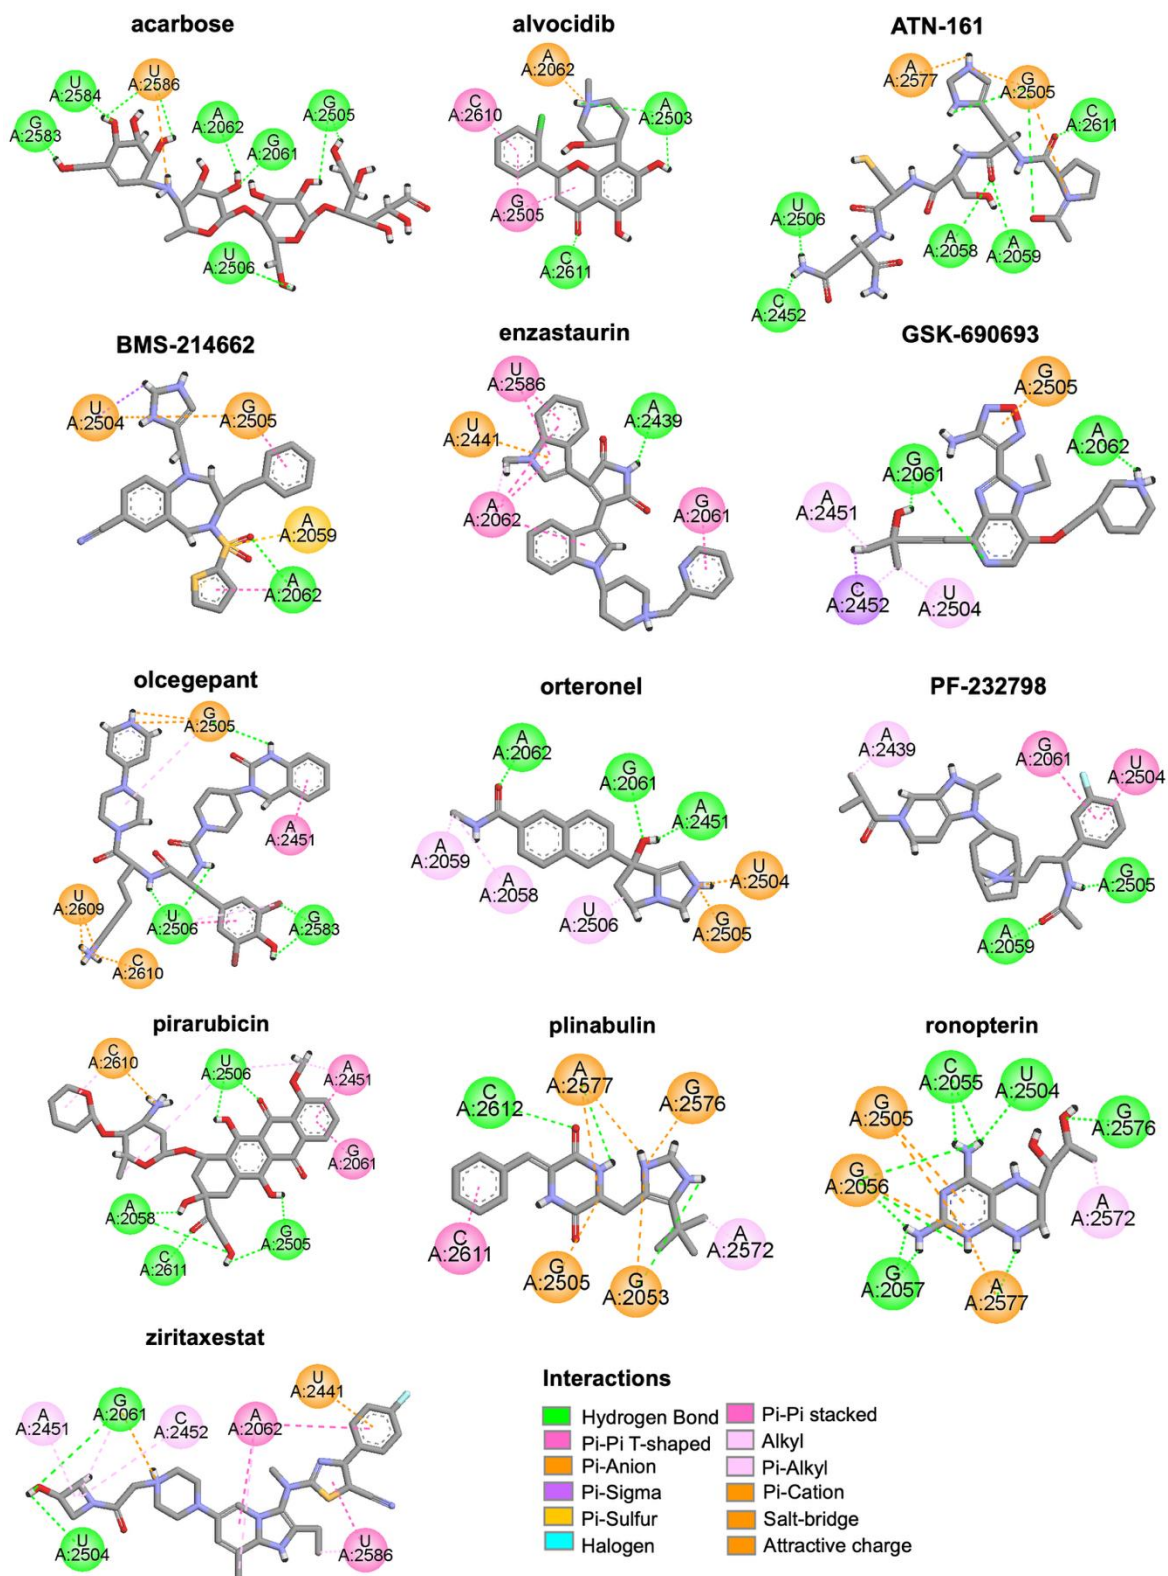

**Figure S9.** 2D interaction maps for Investigational hit compounds obtained from Maestro XP-docking followed by Prime MM-GBSA calculations. Only polar hydrogens are displayed on 2D interaction maps. The non-bonded interactions between the ligand and the surrounding nucleotides based on the color-codes are displayed with dashed lines on 2D maps.

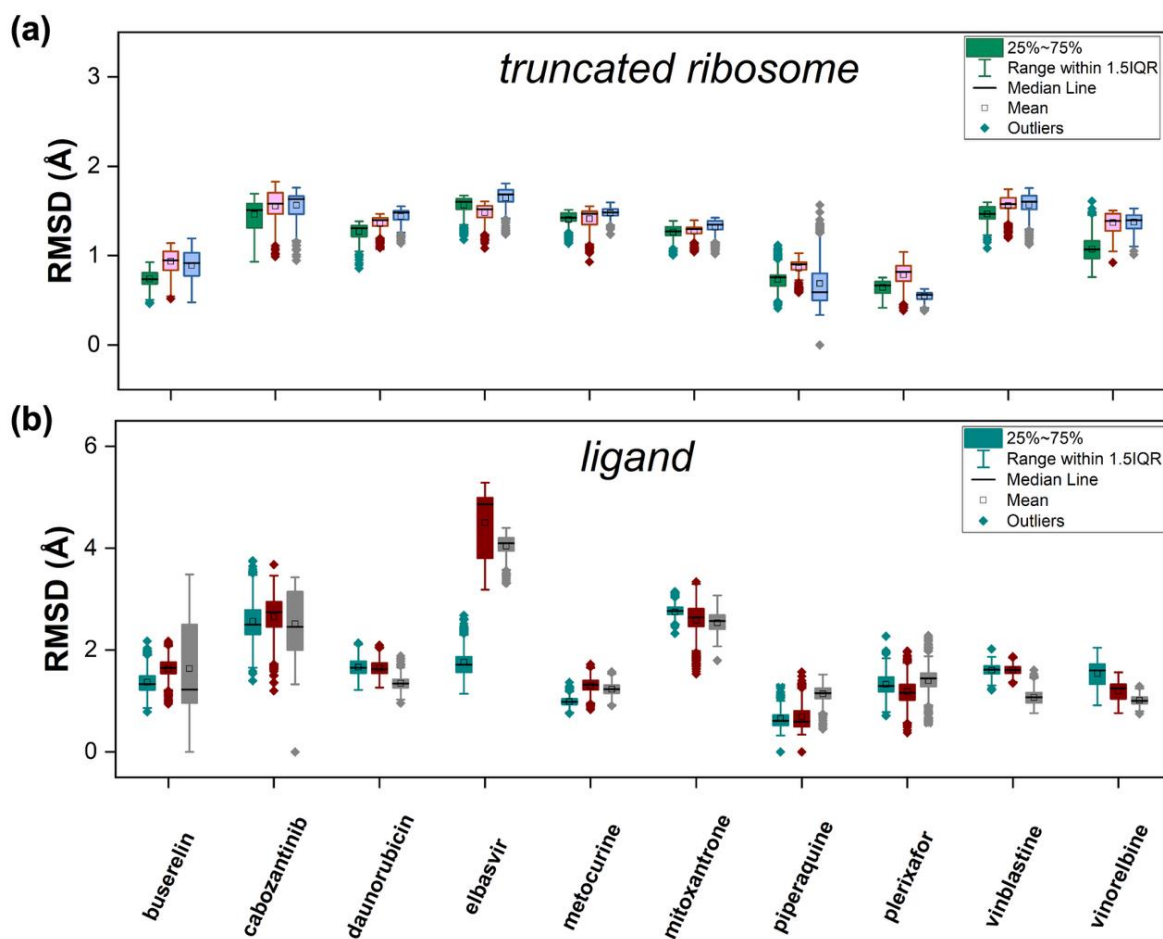

**Figure S10.** Root mean square deviation (RMSD) on all atoms of **(a)** *E. coli* ribosome and **(b)** FDA-approved hit molecules in 100 ns long MD simulations of 3 replicas.

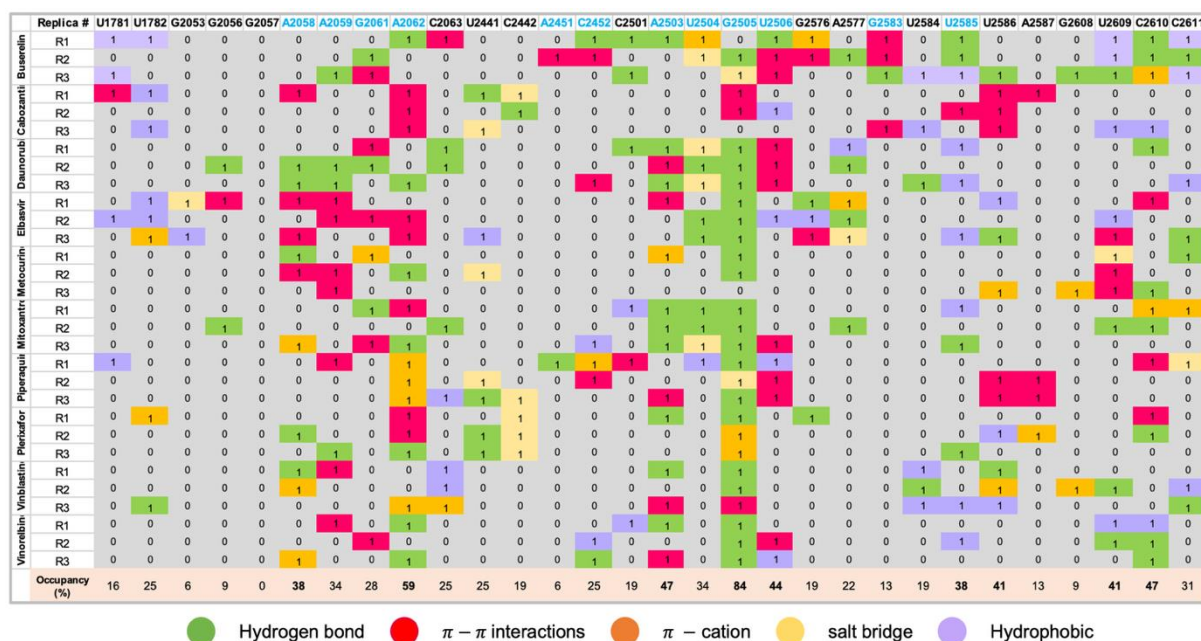

**Figure S11.** RNA-ligand interaction fingerprinting for selected 10 hit FDA-approved drugs. Residues which have high occurrence in non-bonded interactions with the ligands were indicated at the top and the crystal interactions of the known antibiotics bound to PTC (clindamycin, chloramphenicol, linezolid, hygromycin A and A201A) are displayed in blue. Involvement of the residues in non-bonded interactions were colored according to their hydrogen bond (green),  $\pi$ - $\pi$  interaction (pink),  $\pi$ -cation (orange), salt-bridge (light orange) and hydrophobic (slate) interactions. Their occurrence percentages indicated at the bottom. Involvement of the residues in non-bonded interactions (observed in more than 10% of 100 ns long production runs) were indicated by 1, whereas their absence is indicated by 0.

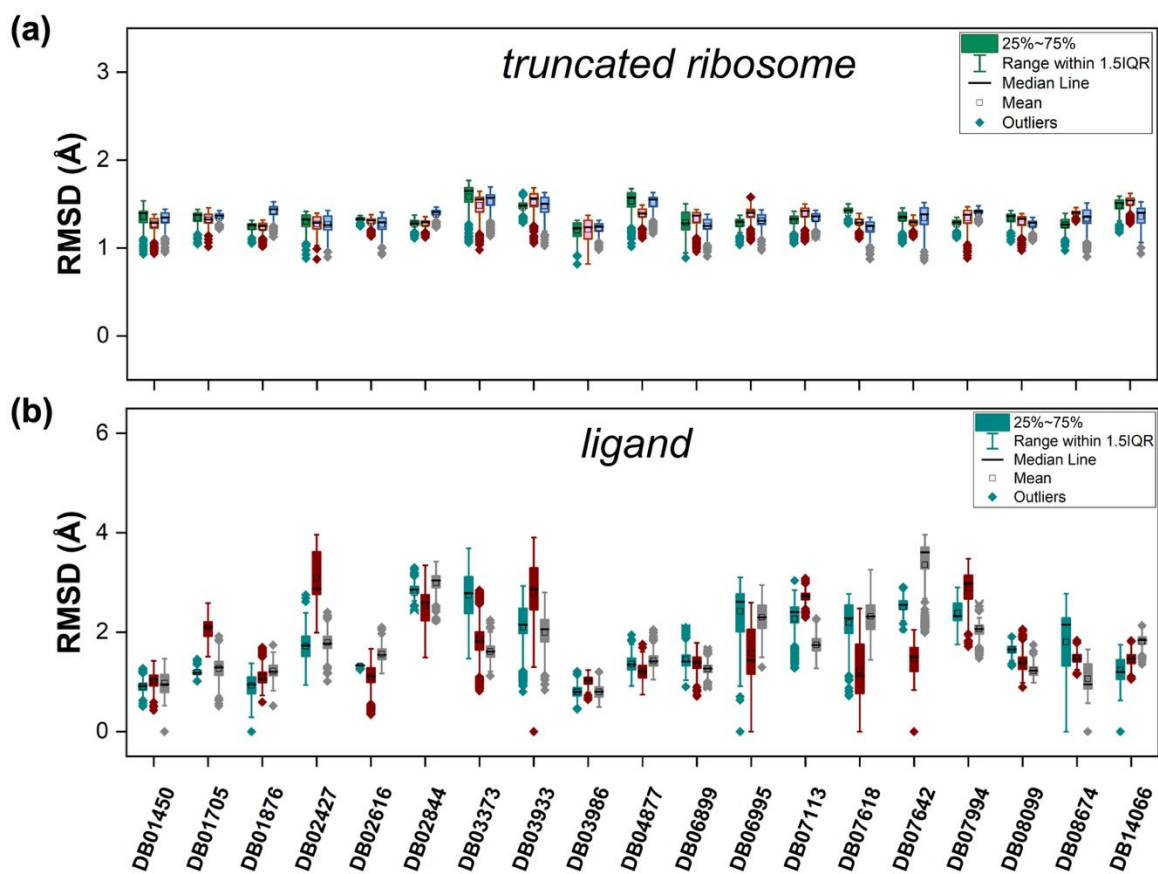

**Figure S12.** Root mean square deviation (RMSD) on all atoms of (a) *E. coli* ribosome and (b) Experimental hit molecules in 100 ns MD simulations of 3 replicas.



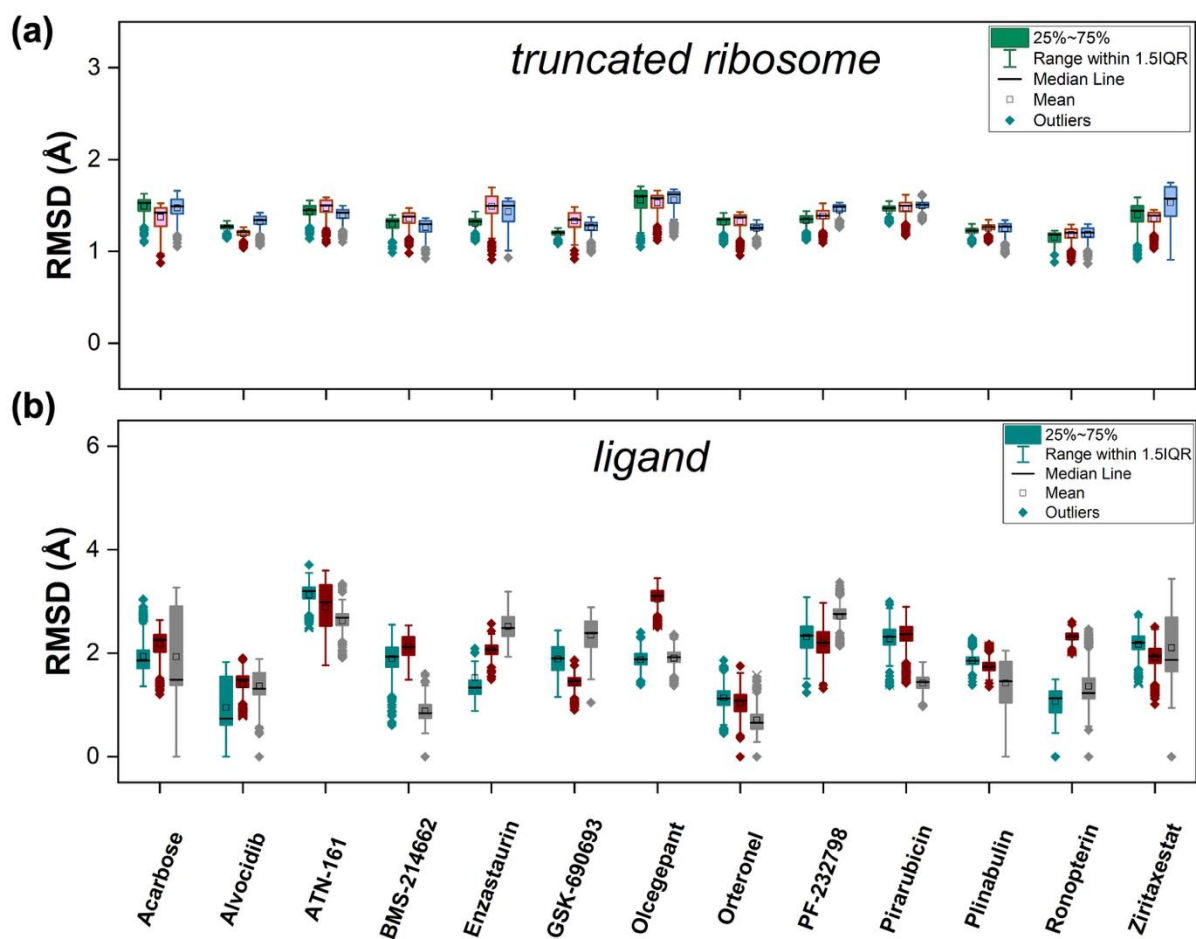

**Figure S14.** Root mean square deviation (RMSD) on all atoms of **(a)** *E. coli* ribosome and **(b)** Investigational hit molecules in 100 ns MD simulations of 3 replicas.

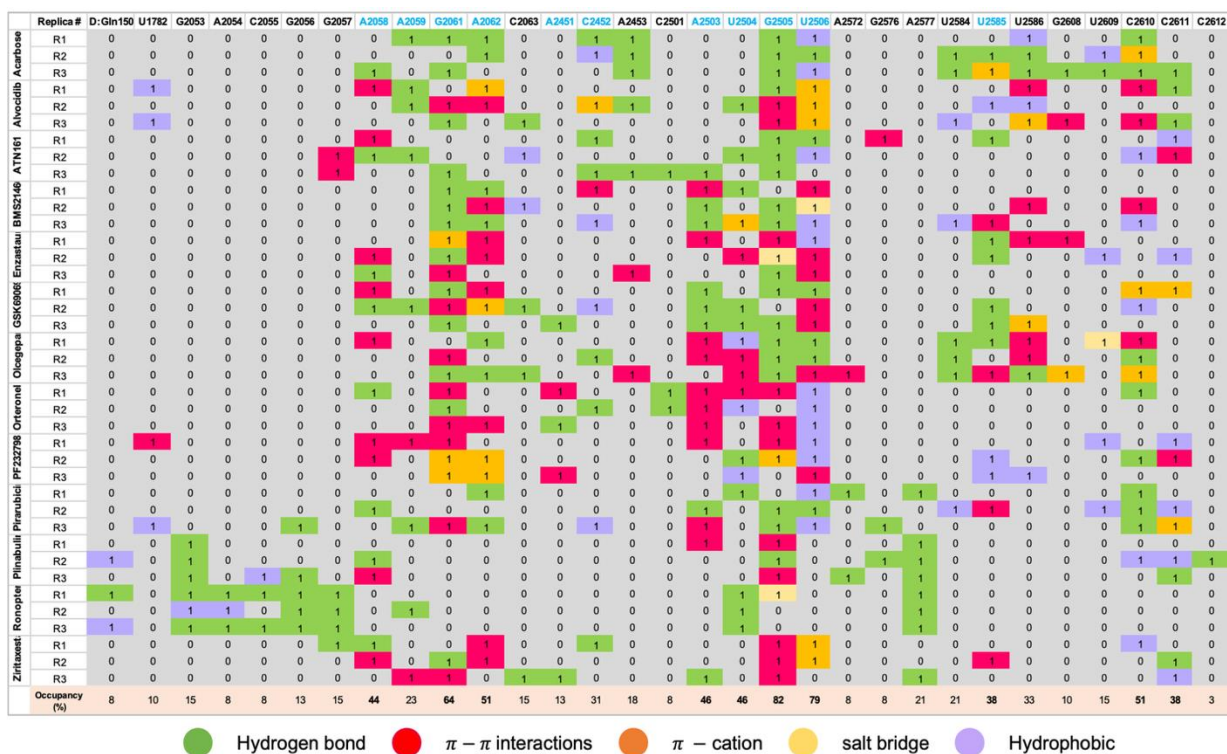

**Figure S15.** RNA-ligand interaction fingerprinting for selected 13 hit investigational drugs. Residues which have high occurrence in non-bonded interactions with the ligands were indicated at the top and the crystal interactions of the known antibiotics bound to PTC (clindamycin, chloramphenicol, linezolid, hygromycin A and A201A) are displayed in blue. Involvement of the residues in non-bonded interactions were colored according to their hydrogen bond (green),  $\pi$ - $\pi$  interaction (pink),  $\pi$ -cation (orange), salt-bridge (light orange) and hydrophobic (slate) interactions. Their occurrence percentages indicated at the bottom. Involvement of the residues in non-bonded interactions (observed in more than 10% of 100 ns long production runs) were indicated by 1, whereas their absence is indicated by 0.

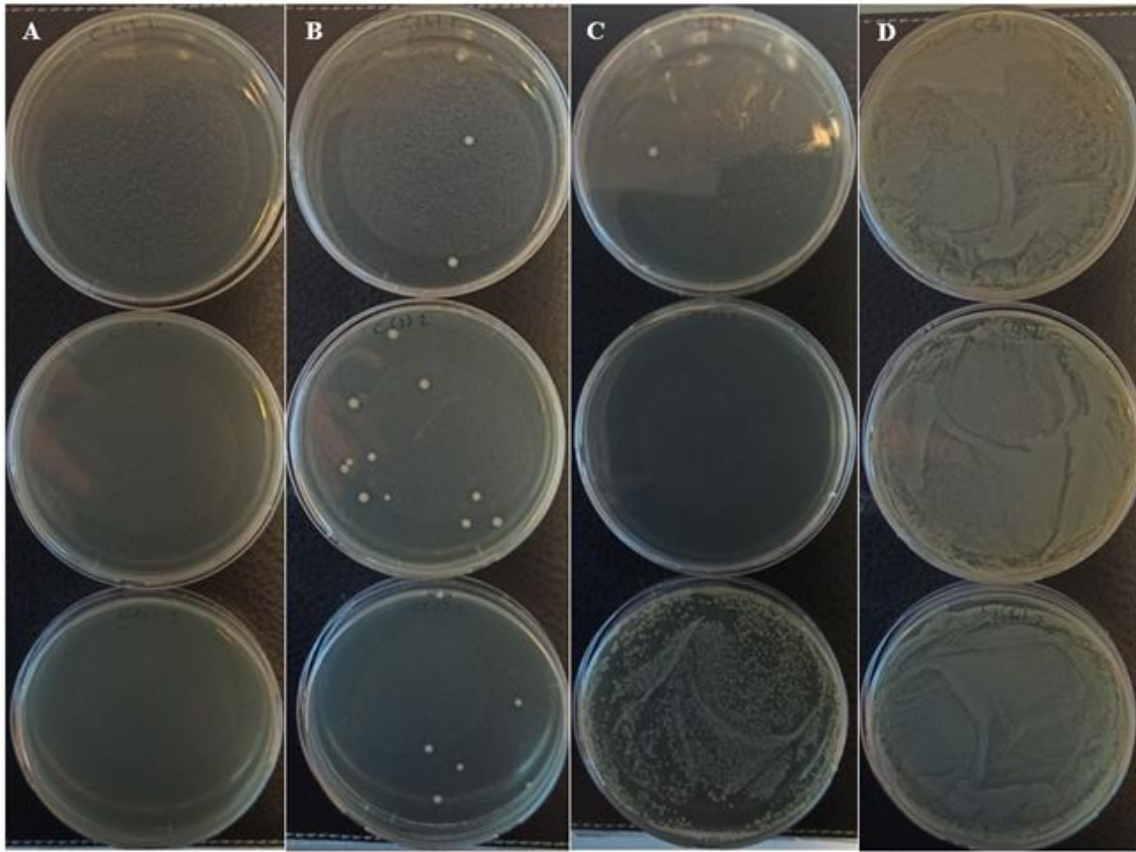

**Figure S16.** LB agar plates inoculated with samples taken from wells of a 96-well microdilution plate used for MIC testing of clindamycin, containing the following concentrations: (A) 128 µg/ml, (B) 64 µg/ml, (C) 32 µg/ml, and (D) 16 µg/ml clindamycin.

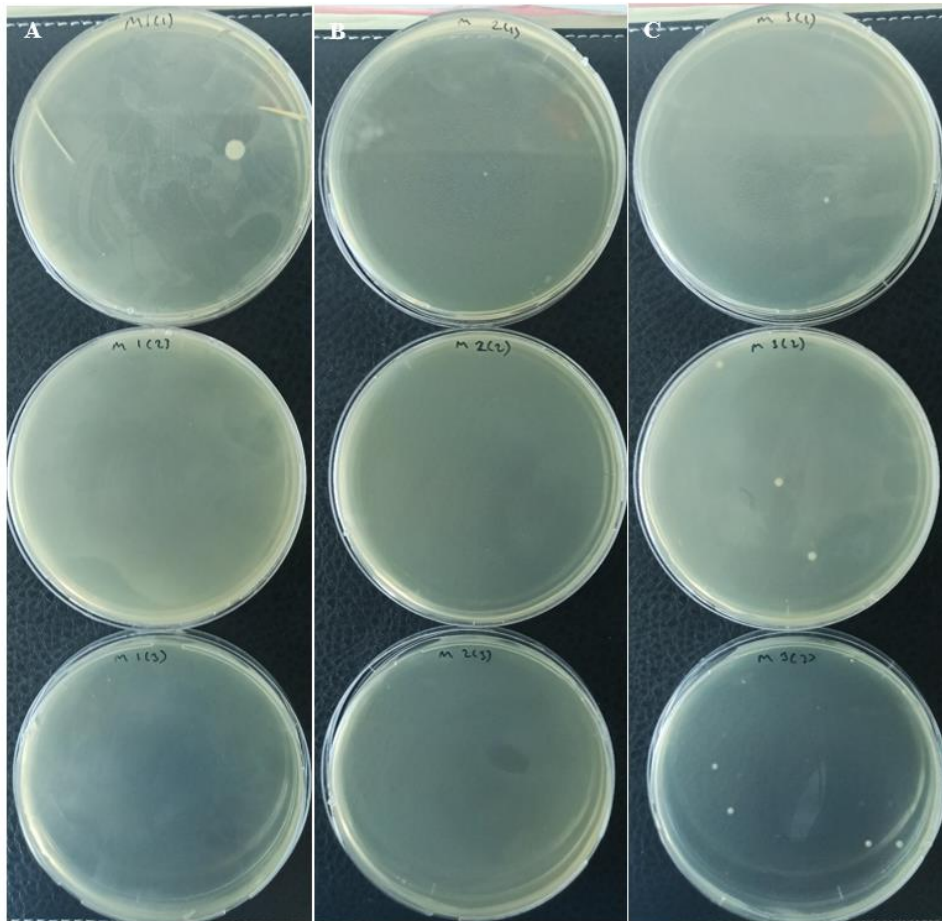

**Figure S17.** LB agar plates inoculated with samples taken from wells of a 96-well microdilution plate used for MIC testing of mitoxantrone, containing the following concentrations: (A) 128  $\mu\text{g/ml}$ , (B) 64  $\mu\text{g/ml}$ , and (C) 32  $\mu\text{g/ml}$  mitoxantrone.

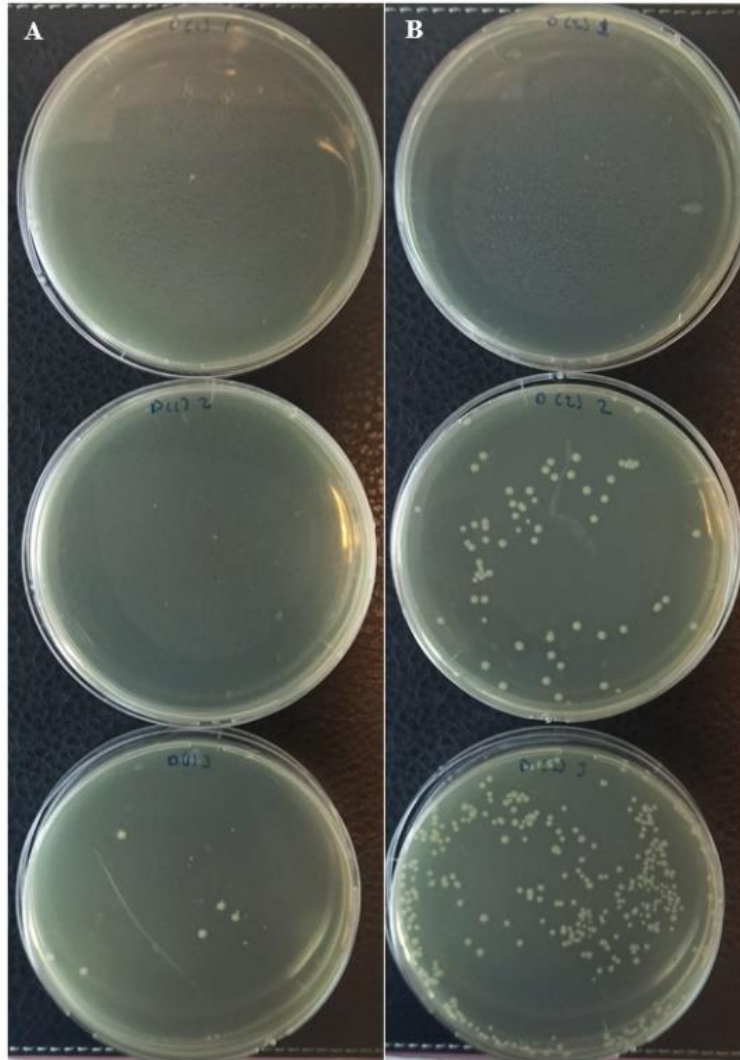

**Figure S18.** LB agar plates inoculated with samples taken from wells of a 96-well microdilution plate used for MIC testing of daunorubicin, containing the following concentrations: (A) 128 µg/ml, and (B) 64 µg/ml daunorubicin.

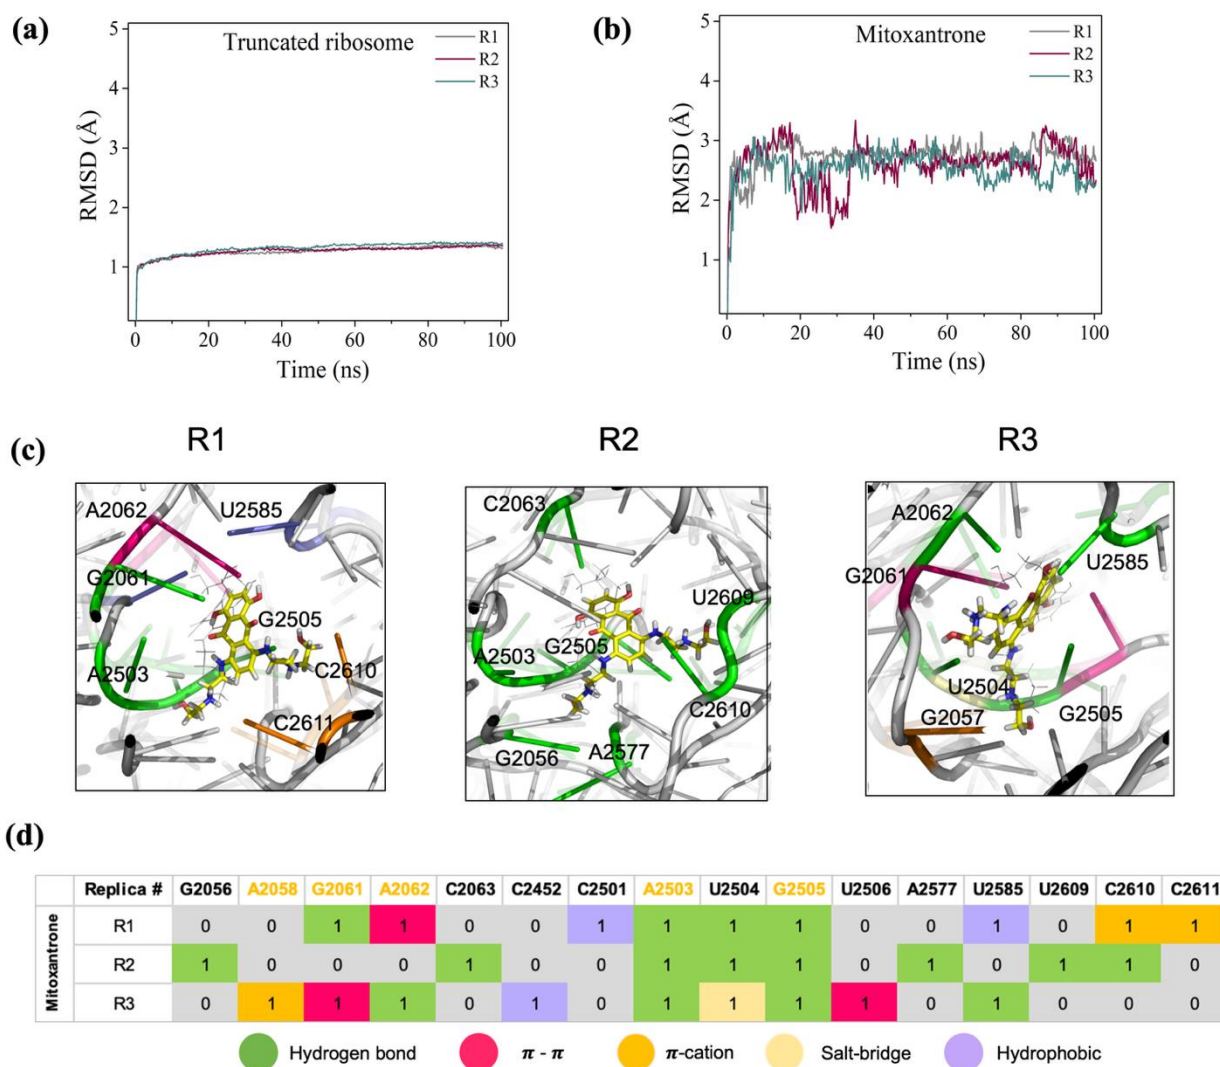

**Figure S19.** RMSD of (a) the truncated ribosomal structure and (b) mitoxantrone from independent MD simulations R1 – R3. (c) Snapshots of the mitoxantrone binding site and non-bonded interactions from R1-R3 simulations. In the snapshots, the frame at 100 ns is highlighted, while the rRNA backbone in the XP-docking pose is transparent, and mitoxantrone is shown in yellow sticks. (e) RNA-ligand interaction fingerprinting for mitoxantrone. Residues that have a high occurrence in non-bonded interactions with the ligand were indicated at the top, and the crystal interactions of the clindamycin are displayed in yellow. The involvement of the residues in non-bonded interactions (observed in more than 10% of 100 ns long production runs) was colored according to their hydrogen bond (green),  $\pi$ -cation (orange),  $\pi - \pi$  interactions, hydrophobic (slate), salt-bridge (light orange), and hydrophobic interactions, indicated by 1, whereas their absence is indicated by 0.

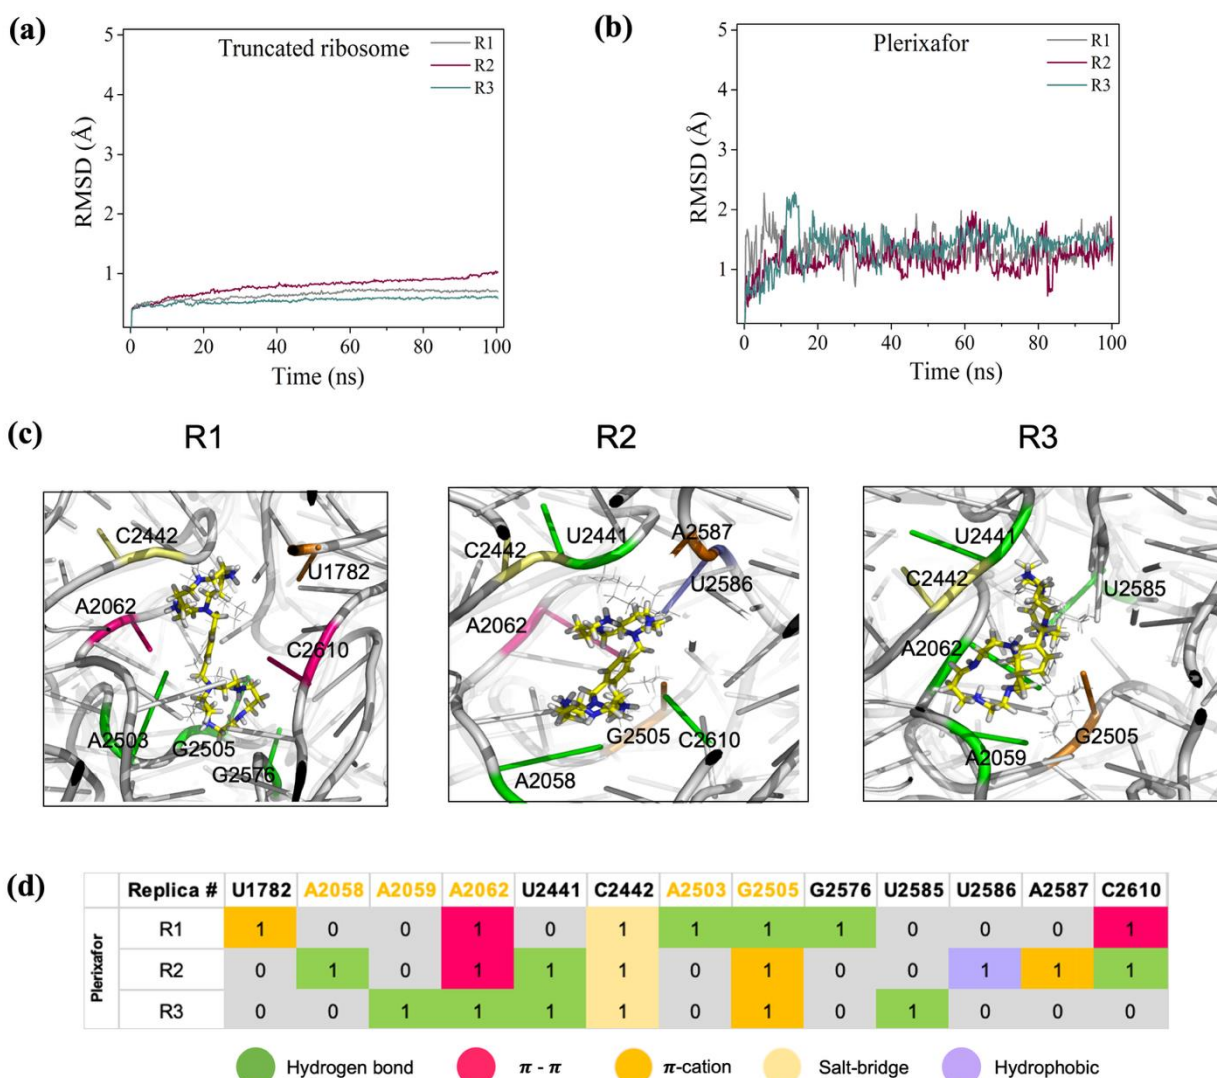

**Figure S20.** RMSD of (a) the truncated ribosomal structure and (b) plerixafor from independent MD simulations R1 – R3. (c) Snapshots of the plerixafor binding site and non-bonded interactions from R1-R3 simulations. In the snapshots, the frame at 100 ns is highlighted, while the rRNA backbone in the XP-docking pose is transparent, and plerixafor is shown in yellow sticks. (e) RNA-ligand interaction fingerprinting for plerixafor. Residues that have a high occurrence in non-bonded interactions with the ligand were indicated at the top, and the crystal interactions of the clindamycin are displayed in yellow. The involvement of the residues in non-bonded interactions (observed in more than 10% of 100 ns long production runs) was colored according to their hydrogen bond (green),  $\pi$ -cation (orange),  $\pi - \pi$  interactions, hydrophobic (slate), salt-bridge (light orange), and hydrophobic interactions, indicated by 1, whereas their absence is indicated by 0.

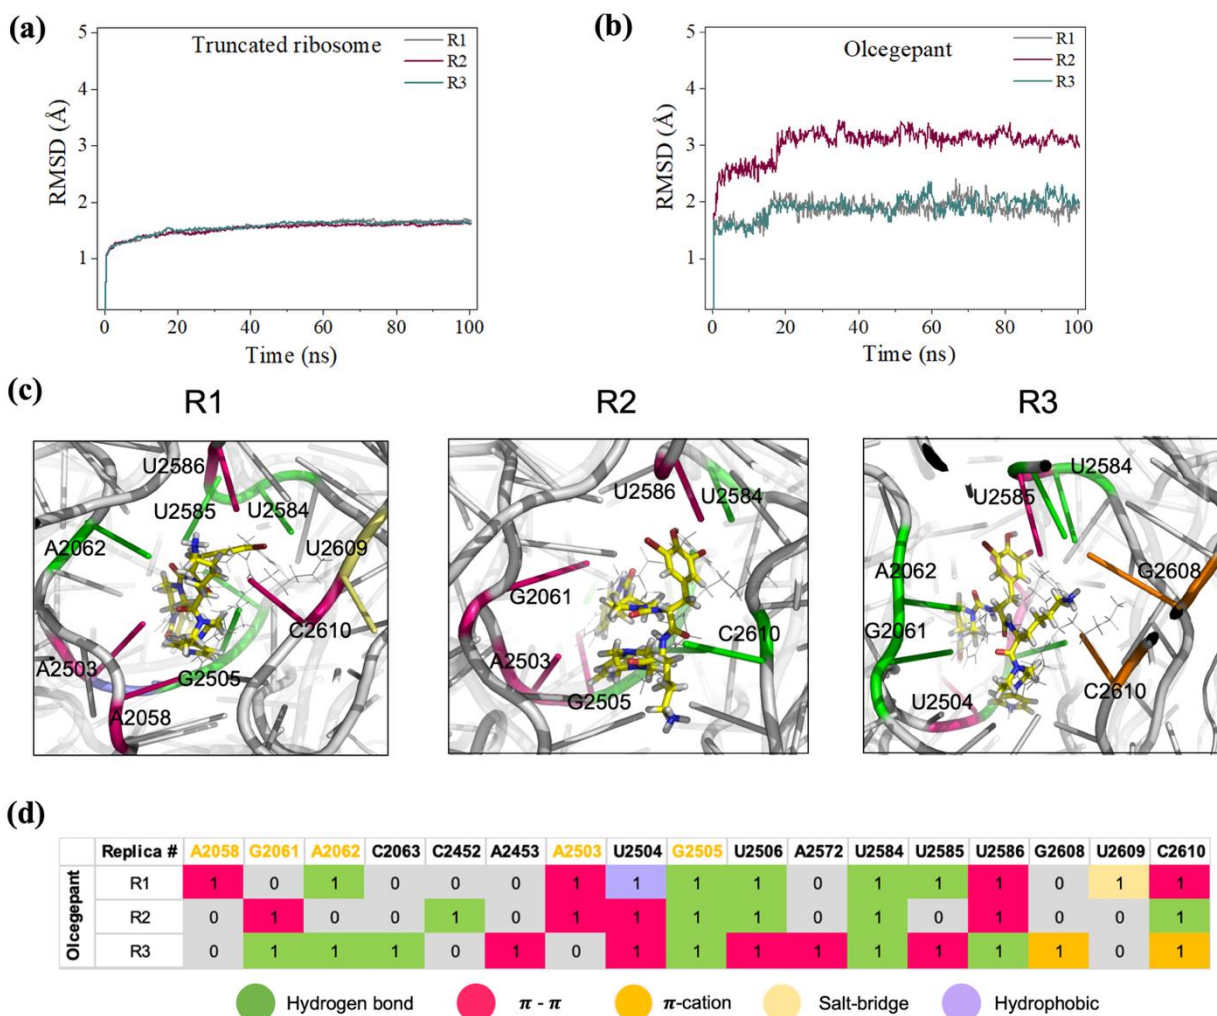

**Figure S21.** RMSD of (a) the truncated ribosomal structure and (b) olcegepant from independent MD simulations R1 – R3. (c) Snapshots of the olcegepant binding site and non-bonded interactions from R1-R3 simulations. In the snapshots, the frame at 100 ns is highlighted, while the rRNA backbone in the XP-docking pose is transparent, and olcegepant is shown in yellow sticks. (e) RNA-ligand interaction fingerprinting for olcegepant. Residues that have a high occurrence in non-bonded interactions with the ligand were indicated at the top, and the crystal interactions of the clindamycin are displayed in yellow. The involvement of the residues in non-bonded interactions (observed in more than 10% of 100 ns long production runs) was colored according to their hydrogen bond (green),  $\pi$ -cation (orange),  $\pi$ - $\pi$  interactions, hydrophobic (slate), salt-bridge (light orange), and hydrophobic interactions, indicated by 1, whereas their absence is indicated by 0.

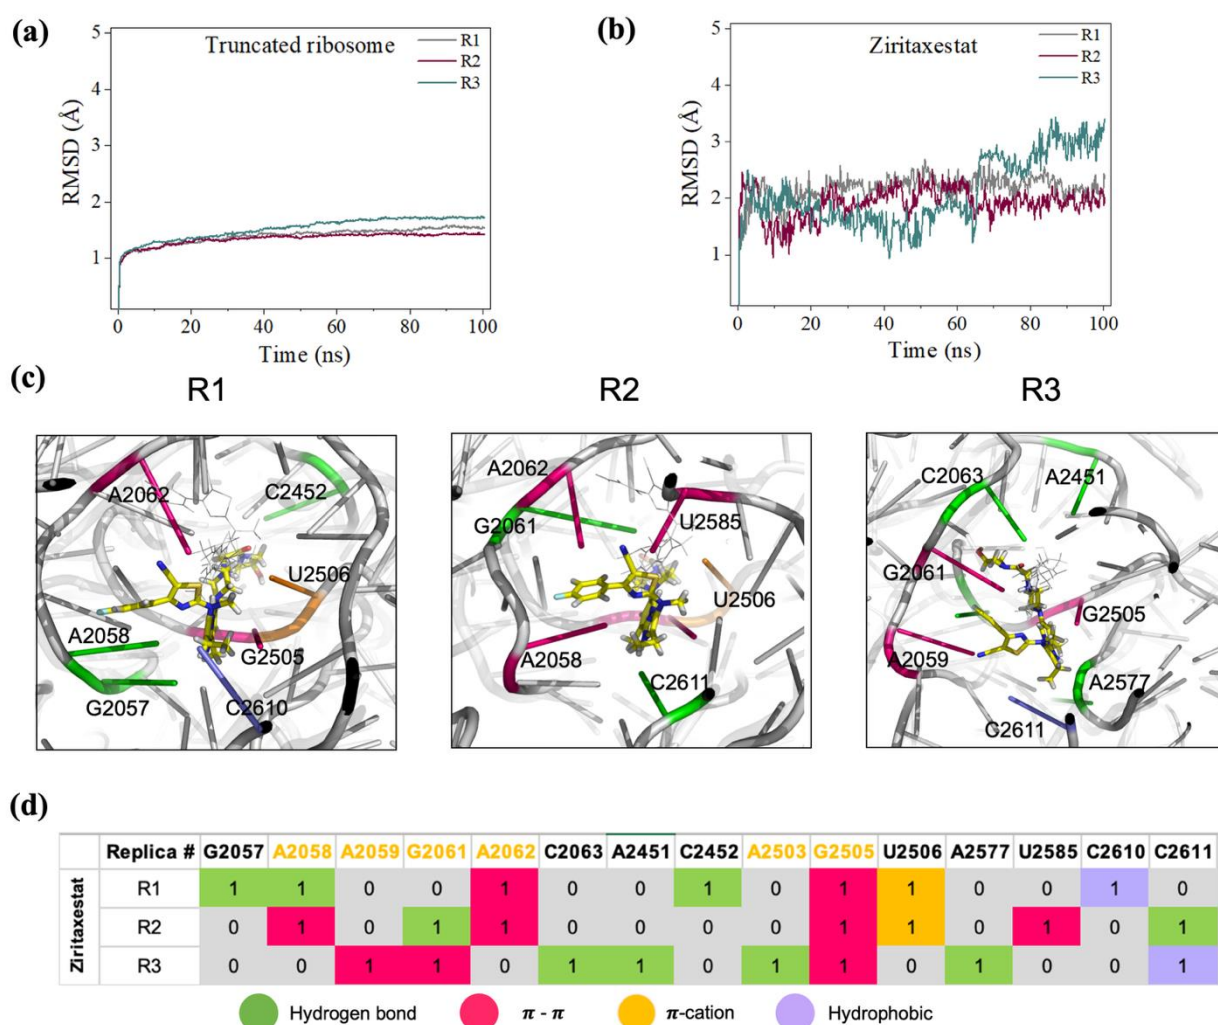

**Figure S22.** RMSD of (a) the truncated ribosomal structure and (b) ziritaxestat from independent MD simulations R1 – R3. (c) Snapshots of the ziritaxestat binding site and non-bonded interactions from R1-R3 simulations. In the snapshots, the frame at 100 ns is highlighted, while the rRNA backbone in the XP-docking pose is transparent, and ziritaxestat is shown in yellow sticks. (e) RNA-ligand interaction fingerprinting for ziritaxestat. Residues that have a high occurrence in non-bonded interactions with the ligand were indicated at the top, and the crystal interactions of the clindamycin are displayed in yellow. The involvement of the residues in non-bonded interactions (observed in more than 10% of 100 ns long production runs) was colored according to their hydrogen bond (green),  $\pi$ -cation (orange),  $\pi - \pi$  interactions, hydrophobic (slate), salt-bridge (light orange), and hydrophobic interactions, indicated by 1, whereas their absence is indicated by 0.

## REFERENCES

- 1 R. A. Friesner, J. L. Banks, R. B. Murphy, T. A. Halgren, J. J. Klicic, D. T. Mainz, M. P. Repasky, E. H. Knoll, M. Shelley, J. K. Perry, D. E. Shaw, P. Francis and P. S. Shenkin, *J. Med. Chem.*, 2004, **47**, 1739–1749.
- 2 M. P. Repasky, M. Shelley and R. A. Friesner, *CP in Bioinformatics*, DOI:10.1002/0471250953.bi0812s18.
- 3 R. A. Friesner, R. B. Murphy, M. P. Repasky, L. L. Frye, J. R. Greenwood, T. A. Halgren, P. C. Sanschagrin and D. T. Mainz, *J. Med. Chem.*, 2006, **49**, 6177–6196.
- 4 O. Trott and A. J. Olson, *J Comput Chem*, 2010, **31**, 455–461.
- 5 R. Quiroga and M. A. Villarreal, *PLoS ONE*, 2016, **11**, e0155183.
